# Supplementary material for: Association of Ketamine With Psychiatric Symptoms and Implications for Its Therapeutic Use and for Understanding Schizophrenia: A Systematic Review and Meta-analysis
Source: PubMed Central journal article supplement (PMC7243091; doi:10.1001/jamanetworkopen.2020.4693), 2020-05-21
Supplement: jamanetwopen-3-e204693-s001.pdf [file jamanetwopen-3-e204693-s001.pdf]

## Supplementary Online Content

Beck K, Hindley G, Borgan F, et al. Association of ketamine with psychiatric symptoms and implications for its therapeutic use and for understanding schizophrenia: a systematic review and meta-analysis. *JAMA Netw Open*. 2020;3(5):e204693. doi:10.1001/jamanetworkopen.2020.4693

**eMethods 1.** Studies and Data Not Included in Meta-analysis

**eMethods 2.** Newcastle-Ottawa Assessment Scale for Cohort Studies

**eMethods 3.** Cochrane Tool for Assessment of Bias Within Individual Studies

**eMethods 4.** Cochrane Tool for Assessment of Bias Across Studies

**eMethods 5.** Refitting the Model Using  $r_i$ 's Taking Values 0.1

**eMethods 6.** Refitting the Model Using  $r_i$ 's Taking Values 0.7

**eMethods 7.** Comparison of the Effect of Ketamine on Positive and Negative Symptoms Using Correlation Coefficient of 0.1

**eMethods 8.** Comparison of the Effect of Ketamine on Positive and Negative Symptoms Using Correlation Coefficient of 0.7

**eMethods 9.** Heterogeneity Statistics for Subgroup Analyses

**eMethods 10.** Subanalyses of Type of Symptom Scale Used

**eFigure 1.** Funnel Plot for Total Symptoms

**eFigure 2.** Funnel Plot for Positive Symptoms

**eFigure 3.** Funnel Plot for Negative Symptoms

**eFigure 4.** Subgroup Analysis of Single-Day vs Multiple-Day Studies for Total Symptoms

**eFigure 5.** Subgroup Analysis of Method of Infusion (Bolus and a Continuous Infusion vs Only a Continuous Infusion) Positive Symptoms

**eTable 1.** Raw Data Used in Total BPRS and PANSS Analysis for Healthy Participants

**eTable 2.** Raw Data Used in Positive BPRS and PANSS Analysis for Healthy Participants

**eTable 3.** Raw Data Used in Negative BPRS and PANSS Analysis for Healthy Participants

**eTable 4.** Raw Data used in Total, Negative and Positive BPRS and PANSS Analysis for People With Schizophrenia

**eTable 5.** Study Description, Ketamine Method, Placebo Condition, Symptoms (BPRS and PANSS), and Exclusion Criteria in Studies Examining Acute Ketamine Administration in Healthy Controls

**eTable 6.** Study Description, Ketamine Administration Method, Placebo Condition, Symptoms (BPRS), and Exclusion Criteria in Studies Examining Acute Ketamine Administration to Patients With Schizophrenia

**eReferences.**

This supplementary material has been provided by the authors to give readers additional information about their work.

## **eMethods 1. Studies and Data Not Included in Meta-analysis**

### **Effect of ketamine administration to healthy controls: meta-analysis**

28 studies<sup>1,2,11–17,3–10</sup> 18 met inclusion but were excluded as they were identified as using data that overlapped with studies that were already included in the meta-analysis. 1 study<sup>19</sup> met inclusion criteria but was excluded from the positive symptom meta-analysis as they were identified as using data that overlapped with other studies already included.

18 studies<sup>15,20,29–36,21–28</sup> did not respond to two requests for data prior to submission. 37–45 replied to the request for data but were unable to provide raw data from their studies, as it was not available.

3 studies<sup>46–48</sup> replied to the first request for data but were not able to provide data by the time of submission.

### **Exclusion based on symptom items (meta-analysis of positive and negative symptoms):**

Studies that appeared to have data for the positive and negative subscales but had not specified the symptom items included – such that we were not able to determine if the study met inclusion criteria for this part of the meta-analysis were emailed to request the items they included. If studies had data for the total symptoms these studies were also emailed to determine if they had raw data for the positive and symptom subscales

8 studies<sup>49–55</sup> were included in the meta-analysis but were not specifically included in the positive symptom analysis as they did not clearly include the items included in the inclusion criteria.

3 Studies<sup>51–53,55</sup> were included in the meta-analysis but were not specifically included in the negative symptom analysis as they did not clearly include the items included in the inclusion criteria.

1 study<sup>56</sup> was not included in the meta-analysis, this study only included information on positive symptoms and there was no information on the items included.

1 study<sup>57</sup> had a score of 0 for both the S.Ds for the ketamine and control condition for positive symptoms, therefore, this was excluded as the effect size could not be calculated in this situation.

### **The effects of ketamine in people with schizophrenia**

1 study<sup>58</sup> met inclusion criteria but was excluded after author confirmed by email that there was sample overlap with other included studies.

1 study<sup>59</sup> had positive and negative symptom data removed from analysis because author confirmed by email that there was sample overlap with other included studies. Where there was overlap the study with the largest sample size was included.

6 studies <sup>18,31,60-63</sup> all from one group met inclusion criteria but were excluded due to the possibility that there was a sample overlap with a study already included. Information was requested from the author by email.

## eMethods 2. Newcastle-Ottawa Assessment Scale for Cohort Studies

|               |      | 1           | 2 | 3 | 4 | 5  | 6 | 7 | 8       |
|---------------|------|-------------|---|---|---|----|---|---|---------|
| Kraguljac     | 2017 | unclear     | * | * | * | ** |   | * | *       |
| Kort          | 2017 | unclear     | * | * | * | *  | * | * | *       |
| Duncan        | 2001 | All male    | * | * | * | *  | * | * | *       |
| Parwani       | 2005 | unclear     | * | * | * | *  | * | * | *       |
| Rowland       | 2005 | All male    | * | * | * | *  | * | * | *       |
| Abel          | 2003 | All male    | * | * |   | ** | * | * | *       |
| Anand         | 2000 | *           | * | * | * | *  | * | * | *       |
| Krystal       | 1998 | *           | * | * | * | *  | * | * | *       |
| Breier        | 1997 | *           | * | * |   | *  | * | * | *       |
| Van Berckel   | 1998 | All male    | * | * | * | *  | * | * | *       |
| Malhotra      | 1997 | *           | * | * | * | *  | * | * | *       |
| Krystal       | 1999 | *           | * | * | * | *  | * | * | *       |
| Krystal       | 2003 | *           | * | * | * | *  | * | * | *       |
| Micallef      | 2002 | 22-33 years | * | * | * | *  | * | * | *       |
| Rowland       | 2010 | unclear     | * | * | * | *  | * | * | *       |
| Newcomer      | 1999 | All male    | * | * | * | ** | * | * |         |
| Stone         | 2011 | All male    | * | * |   | ** | * | * | *       |
| Boeijinga     | 2007 | All male    | * | * | * | *  | * | * | *       |
| Passie        | 2003 | All male    | * | * |   | *  | * | * | *       |
| Abdallah      | 2018 | unclear     | * | * |   | *  |   | * | *       |
| Morgan        | 2011 | unclear     | * | * |   | *  | * | * | *       |
| Horacek       | 2010 | *           | * | * | * | *  | * | * | *       |
| Thiebes       | 2017 | All male    | * | * | * | *  |   | * |         |
| Powers        | 2015 | unclear     | * | * |   | *  |   | * | *       |
| Mathalon      | 2014 | *           | * | * | * | *  | * | * | unclear |
| Hoflich       | 2015 | unclear     | * | * | * | *  | * | * | *       |
| Nagels        | 2011 | All male    | * | * | * | *  | * | * | *       |
| Driesen       | 2013 | *           | * | * | * | *  |   | * | *       |
| Vernaleken    | 2013 | All male    | * | * | * | *  |   | * | *       |
| Krystal       | 2005 | unclear     | * | * | * | *  | * | * | *       |
| Krystal       | 2006 | unclear     | * | * | * | *  | * | * | *       |
| Kleinloog     | 2015 | *           | * | * |   | *  | * | * | *       |
| D'Souza       | 2012 | unclear     | * | * |   | *  | * | * | *       |
| Grent-'t-Jong | 2018 | *           | * | * | * | *  |   | * | *       |
| D'Souza       | 2018 | *           | * | * | * | *  | * | * | *       |
| Dickerson     | 2010 | unclear     | * | * |   | *  |   | * | unclear |

- 1) **Representativeness of the exposed cohort:** \* = “truly representative of average healthy individual in the community” or “somewhat representative of the average healthy individual in the community”
- 2) **Selection of the non-exposed cohort:**\* = “Drawn from the same community as the exposed cohort” (within person design)
- 3) **Ascertainment of exposure:** \* = “Secure record” or “Structured interview” (exposure provided as part of an experiment)
- 4) **Demonstration that outcome of interest was not present at start of study:** \* = “yes”  
i.e SCID used to screen out people with significant psychopathology
- 5) **Comparability of cohorts on the basis of the design or analysis:**
  - a. \* = study controls for prior ketamine use
  - b. \* = study controls for additional factor/factors
- 6) **Assessment of outcome:** \* = “independent blind assessment” or “record linkage”
- 7) **Was a follow-up long enough for outcomes to occur:** \* = “yes” ie there was sufficient timepoints to show peak psychopathology
- 8) **Adequacy of follow-up cohorts:** \* = “Complete follow-up – all subjects accounted for” or subjects lost to follow-up unlikely to introduce bias – number lost <20% or description provide of those lost”

### eMethods 3. Cochrane Tool for Assessment of Bias Within Individual Studies

| Study            | Selection bias             |                        | Performance bias                       | Detection bias                 | Attrition bias                                                                                                                                         | Reporting bias            |
|------------------|----------------------------|------------------------|----------------------------------------|--------------------------------|--------------------------------------------------------------------------------------------------------------------------------------------------------|---------------------------|
|                  | Random sequence generation | Allocation concealment | Blinding of participants and personnel | Blinding of outcome assessment | Incomplete outcome data                                                                                                                                | Selective reporting       |
| Kraguljac 2017   | High risk-unblinded        | High risk-unblinded    | High risk - unblinded                  | High risk-unblinded            | Low risk- no missing data                                                                                                                              | Low risk – outcomes clear |
| Kort 2017        | Unclear                    | Unclear                | Low risk                               | Low risk                       | Low risk – no missing data                                                                                                                             | Low risk – outcomes clear |
| Duncan 2001      | Unclear                    | Unclear                | Low risk                               | Low risk                       | Low risk – no missing data                                                                                                                             | Low risk- outcomes clear  |
| Parwani 2005     | Unclear                    | Unclear                | Low risk                               | Low risk                       | Low risk – no missing data                                                                                                                             | Low risk- outcomes clear  |
| Rowland 2005     | Unclear                    | Unclear                | Low risk                               | Low risk                       | Low risk – no missing data                                                                                                                             | Low risk- outcomes clear  |
| Abel 2003        | Unclear                    | Unclear                | Low risk                               | Low risk                       | Low risk – no missing data                                                                                                                             | Low risk- outcomes clear  |
| Anand 2000       | Unclear                    | Unclear                | Low risk                               | Low risk                       | Low risk - <20% drop outs and missing outcome data balanced in numbers across intervention groups, with similar reasons for missing data across groups | Low risk- outcomes clear  |
| Krystal 1998     | Unclear                    | Unclear                | Low risk                               | Low risk                       | Low risk – no missing data                                                                                                                             | Low risk- outcomes clear  |
| Breier 1997      | Unclear                    | Unclear                | Low risk                               | Low risk                       | Low risk - <20% drop outs and missing outcome data balanced in numbers across intervention groups, with similar reasons for missing data across groups | Low risk- outcomes clear  |
| Van Berckel 1998 | Unclear                    | Unclear                | Low risk                               | Low risk                       | Low risk - <20% drop outs and missing outcome data balanced in numbers across intervention groups, with similar reasons for missing data across groups | Low risk- outcomes clear  |
| Malhotra 1997    | Unclear                    | Unclear                | Low risk                               | Low risk                       | Low risk – no missing data                                                                                                                             | Low risk- outcomes clear  |
| Krystal 1999     | Unclear                    | Unclear                | Low risk                               | Low risk                       | Low risk - <20% drop outs and missing outcome data balanced in numbers across intervention groups, with similar reasons for                            | Low risk- outcomes clear  |

|                |                            |                            |                         |                         |                                                                                                                                                                     |                          |
|----------------|----------------------------|----------------------------|-------------------------|-------------------------|---------------------------------------------------------------------------------------------------------------------------------------------------------------------|--------------------------|
|                |                            |                            |                         |                         | missing data across groups                                                                                                                                          |                          |
| Krystal 2003   | Unclear                    | Unclear                    | Low risk                | Low risk                | Low risk - <20% drop outs and missing outcome data balanced in numbers across intervention groups, with similar reasons for missing data across groups              | Low risk- outcomes clear |
| Micallef 2002  | Unclear                    | Unclear                    | Low risk                | Low risk                | Low risk – no missing data                                                                                                                                          | Low risk- outcomes clear |
| Rowland 2010   | Unclear                    | Unclear                    | Low risk                | Low risk                | Low risk – no missing data                                                                                                                                          | Low risk- outcomes clear |
| Newcomer 1999  | Unclear                    | Unclear                    | Low risk                | Low risk                | Low risk – no missing data                                                                                                                                          | Low risk- outcomes clear |
| Stone 2011     | Unclear                    | Unclear                    | Low risk                | Low risk                | Low risk - <20% drop outs and missing outcome data balanced in numbers across intervention groups, with similar reasons for missing data across groups              | Low risk- outcomes clear |
| Boeijinga 2007 | Unclear                    | Unclear                    | Low risk                | Low risk                | Low risk – no missing data                                                                                                                                          | Low risk- outcomes clear |
| Passie 2003    | Unclear                    | Unclear                    | Low risk                | Low risk                | Low risk – no missing data                                                                                                                                          | Low risk- outcomes clear |
| Abdallah 2018  | High risk- single blind    | High risk-single blind     | High risk -single blind | High risk -single blind | Low risk - <20% drop outs and missing outcome data balanced in numbers across intervention groups, with similar reasons for missing data across groups              | Low risk- outcomes clear |
| Morgan 2011    | High risk – not randomized | High risk – not randomized | Low risk                | Low risk                | Low risk – no missing data                                                                                                                                          | Low risk- outcomes clear |
| Horacek 2010   | Unclear                    | Unclear                    | Low risk                | Low risk                | Low risk – no missing data                                                                                                                                          | Low risk- outcomes clear |
| Thiebes 2017   | High risk- single blind    | High risk-single blind     | High risk-single blind  | High risk-single blind  | Low risk – no missing data                                                                                                                                          | Low risk- outcomes clear |
| Powers 2015    | High risk- unblinded       | High risk- unblinded       | High risk- unblinded    | High risk- unblinded    | Low risk - <20% drop outs and missing outcome data balanced in numbers across intervention groups, with similar reasons for missing data across groups              | Low risk- outcomes clear |
| Mathalon 2014  | Unclear                    | Unclear                    | Low risk                | Low risk                | Low risk – unclear how many drop outs occurred but outcome data balanced in numbers across intervention groups, with similar reasons for missing data across groups | Low risk- outcomes clear |

|                    |                                        |                                        |                                        |                                       |                                                                                                                                                                     |                          |
|--------------------|----------------------------------------|----------------------------------------|----------------------------------------|---------------------------------------|---------------------------------------------------------------------------------------------------------------------------------------------------------------------|--------------------------|
| Hoflich 2015       | Unclear                                | Unclear                                | Low risk                               | Low risk                              | Low risk – unclear how many drop outs occurred but outcome data balanced in numbers across intervention groups, with similar reasons for missing data across groups | Low risk- outcomes clear |
| Nagels 2011        | Unclear                                | Unclear                                | Low risk                               | Low risk                              | Low risk – no missing data                                                                                                                                          | Low risk- outcomes clear |
| Driesen 2013       | High risk-unblinded                    | High risk-unblinded                    | High risk-unblinded                    | High risk-unblinded                   | Low risk – no missing data                                                                                                                                          | Low risk- outcomes clear |
| Vernaleken 2013    | High risk-single blind                 | High risk-single blind                 | High risk-single blind                 | High risk-single blind                | Low risk – no missing data                                                                                                                                          | Low risk- outcomes clear |
| Krystal 2005       | Unclear                                | Unclear                                | Low risk                               | Low risk                              | Low risk – unclear how many drop outs occurred but outcome data balanced in numbers across intervention groups, with similar reasons for missing data across groups | Low risk- outcomes clear |
| Krystal 2006       | Unclear                                | Unclear                                | Low risk                               | Low risk                              | Low risk –<20% drop outs, missing outcome data balanced in numbers across intervention groups, with similar reasons for missing data across groups                  | Low risk- outcomes clear |
| Kleinloog 2015     | Unclear                                | Unclear                                | Low risk                               | Low risk                              | Low risk – no missing data                                                                                                                                          | Low risk- outcomes clear |
| D'Souza 2012       | Unclear                                | Unclear                                | Low risk                               | Low risk                              | Low risk - <20% drop outs and missing outcome data balanced in numbers across intervention groups, with similar reasons for missing data across groups              | Low risk- outcomes clear |
| Grent-'t-Jong 2018 | High risk-single blind                 | High risk-single blind                 | High risk-single blind                 | High risk-single blind                | Low risk – no missing data                                                                                                                                          | Low risk- outcomes clear |
| D'Souza 2018       | Unclear - blinding status not recorded | Unclear - blinding status not recorded | Unclear - blinding status not recorded | Unclear -blinding status not recorded | Low risk - <20% drop outs and missing outcome data balanced in numbers across intervention groups, with similar reasons for missing data across groups              | Low risk- outcomes clear |
| Dickerson 2010     | High risk-single blind                 | High risk-single blind                 | High risk-single blind                 | High risk-single blind                | Unclear                                                                                                                                                             | Low risk- outcomes clear |



| <b>RANDOM SEQUENCE GENERATION</b>                                                                                            |                                                                                                                                                                                                                                                                                                                                                                                                                                                                                                                                                                                                                                                                                                                                                                                                                                                                                                                                                                                                                         |
|------------------------------------------------------------------------------------------------------------------------------|-------------------------------------------------------------------------------------------------------------------------------------------------------------------------------------------------------------------------------------------------------------------------------------------------------------------------------------------------------------------------------------------------------------------------------------------------------------------------------------------------------------------------------------------------------------------------------------------------------------------------------------------------------------------------------------------------------------------------------------------------------------------------------------------------------------------------------------------------------------------------------------------------------------------------------------------------------------------------------------------------------------------------|
| <b>Selection bias (biased allocation to interventions) due to inadequate generation of a randomised sequence.</b>            |                                                                                                                                                                                                                                                                                                                                                                                                                                                                                                                                                                                                                                                                                                                                                                                                                                                                                                                                                                                                                         |
| Criteria for a judgement of 'Low risk' of bias.                                                                              | <p>The investigators describe a random component in the sequence generation process such as:</p> <ul style="list-style-type: none"> <li>• Referring to a random number table;</li> <li>• Using a computer random number generator;</li> <li>• Coin tossing;</li> <li>• Shuffling cards or envelopes;</li> <li>• Throwing dice;</li> <li>• Drawing of lots;</li> <li>• Minimization*.</li> </ul> <p>*Minimization may be implemented without a random element, and this is considered to be equivalent to being random.</p>                                                                                                                                                                                                                                                                                                                                                                                                                                                                                              |
| Criteria for the judgement of 'High risk' of bias.                                                                           | <p>The investigators describe a non-random component in the sequence generation process. Usually, the description would involve some systematic, non-random approach, for example:</p> <ul style="list-style-type: none"> <li>• Sequence generated by odd or even date of birth;</li> <li>• Sequence generated by some rule based on date (or day) of admission;</li> <li>• Sequence generated by some rule based on hospital or clinic record number.</li> </ul> <p>Other non-random approaches happen much less frequently than the systematic approaches mentioned above and tend to be obvious. They usually involve judgement or some method of non-random categorization of participants, for example:</p> <ul style="list-style-type: none"> <li>• Allocation by judgement of the clinician;</li> <li>• Allocation by preference of the participant;</li> <li>• Allocation based on the results of a laboratory test or a series of tests;</li> <li>• Allocation by availability of the intervention.</li> </ul> |
| Criteria for the judgement of 'Unclear risk' of bias.                                                                        | Insufficient information about the sequence generation process to permit judgement of 'Low risk' or 'High risk'.                                                                                                                                                                                                                                                                                                                                                                                                                                                                                                                                                                                                                                                                                                                                                                                                                                                                                                        |
| <b>ALLOCATION CONCEALMENT</b>                                                                                                |                                                                                                                                                                                                                                                                                                                                                                                                                                                                                                                                                                                                                                                                                                                                                                                                                                                                                                                                                                                                                         |
| <b>Selection bias (biased allocation to interventions) due to inadequate concealment of allocations prior to assignment.</b> |                                                                                                                                                                                                                                                                                                                                                                                                                                                                                                                                                                                                                                                                                                                                                                                                                                                                                                                                                                                                                         |
| Criteria for a judgement of 'Low risk' of bias.                                                                              | <p>Participants and investigators enrolling participants could not foresee assignment because one of the following, or an equivalent method, was used to conceal allocation:</p> <ul style="list-style-type: none"> <li>• Central allocation (including telephone, web-based and pharmacy-controlled randomization);</li> </ul>                                                                                                                                                                                                                                                                                                                                                                                                                                                                                                                                                                                                                                                                                         |

|                                                                                                                                                                                     |                                                                                                                                                                                                                                                                                                                                                                                                                                                                                                                                                                                                        |
|-------------------------------------------------------------------------------------------------------------------------------------------------------------------------------------|--------------------------------------------------------------------------------------------------------------------------------------------------------------------------------------------------------------------------------------------------------------------------------------------------------------------------------------------------------------------------------------------------------------------------------------------------------------------------------------------------------------------------------------------------------------------------------------------------------|
|                                                                                                                                                                                     | <ul style="list-style-type: none"> <li>• Sequentially numbered drug containers of identical appearance;</li> <li>• Sequentially numbered, opaque, sealed envelopes.</li> </ul>                                                                                                                                                                                                                                                                                                                                                                                                                         |
| Criteria for the judgement of 'High risk' of bias.                                                                                                                                  | <p>Participants or investigators enrolling participants could possibly foresee assignments and thus introduce selection bias, such as allocation based on:</p> <ul style="list-style-type: none"> <li>• Using an open random allocation schedule (e.g. a list of random numbers);</li> <li>• Assignment envelopes were used without appropriate safeguards (e.g. if envelopes were unsealed or nonopaque or not sequentially numbered);</li> <li>• Alternation or rotation;</li> <li>• Date of birth;</li> <li>• Case record number;</li> <li>• Any other explicitly unconcealed procedure.</li> </ul> |
| Criteria for the judgement of 'Unclear risk' of bias.                                                                                                                               | <p>Insufficient information to permit judgement of 'Low risk' or 'High risk'. This is usually the case if the method of concealment is not described or not described in sufficient detail to allow a definite judgement – for example if the use of assignment envelopes is described, but it remains unclear whether envelopes were sequentially numbered, opaque and sealed.</p>                                                                                                                                                                                                                    |
| <p><b>BLINDING OF PARTICIPANTS AND PERSONNEL</b></p> <p><b>Performance bias due to knowledge of the allocated interventions by participants and personnel during the study.</b></p> |                                                                                                                                                                                                                                                                                                                                                                                                                                                                                                                                                                                                        |
| Criteria for a judgement of 'Low risk' of bias.                                                                                                                                     | <p>Any one of the following:</p> <ul style="list-style-type: none"> <li>• No blinding or incomplete blinding, but the review authors judge that the outcome is not likely to be influenced by lack of blinding;</li> <li>• Blinding of participants and key study personnel ensured, and unlikely that the blinding could have been broken.</li> </ul>                                                                                                                                                                                                                                                 |
| Criteria for the judgement of 'High risk' of bias.                                                                                                                                  | <p>Any one of the following:</p> <ul style="list-style-type: none"> <li>• No blinding or incomplete blinding, and the outcome is likely to be influenced by lack of blinding;</li> <li>• Blinding of key study participants and personnel attempted, but likely that the blinding could have been broken, and the outcome is likely to be influenced by lack of blinding.</li> </ul>                                                                                                                                                                                                                   |
| Criteria for the judgement of 'Unclear risk' of bias.                                                                                                                               | <p>Any one of the following:</p> <ul style="list-style-type: none"> <li>• Insufficient information to permit judgement of 'Low risk' or 'High risk';</li> <li>• The study did not address this outcome.</li> </ul>                                                                                                                                                                                                                                                                                                                                                                                     |
| <p><b>BLINDING OF OUTCOME ASSESSMENT</b></p> <p><b>Detection bias due to knowledge of the allocated interventions by outcome assessors.</b></p>                                     |                                                                                                                                                                                                                                                                                                                                                                                                                                                                                                                                                                                                        |
| Criteria for a judgement of 'Low risk' of bias.                                                                                                                                     | <p>Any one of the following:</p>                                                                                                                                                                                                                                                                                                                                                                                                                                                                                                                                                                       |

|                                                                                                                                  |                                                                                                                                                                                                                                                                                                                                                                                                                                                                                                                                                                                                                                                                                                                                                                                                                                                                                                       |
|----------------------------------------------------------------------------------------------------------------------------------|-------------------------------------------------------------------------------------------------------------------------------------------------------------------------------------------------------------------------------------------------------------------------------------------------------------------------------------------------------------------------------------------------------------------------------------------------------------------------------------------------------------------------------------------------------------------------------------------------------------------------------------------------------------------------------------------------------------------------------------------------------------------------------------------------------------------------------------------------------------------------------------------------------|
|                                                                                                                                  | <ul style="list-style-type: none"> <li>• No blinding of outcome assessment, but the review authors judge that the outcome measurement is not likely to be influenced by lack of blinding;</li> <li>• Blinding of outcome assessment ensured, and unlikely that the blinding could have been broken.</li> </ul>                                                                                                                                                                                                                                                                                                                                                                                                                                                                                                                                                                                        |
| Criteria for the judgement of 'High risk' of bias.                                                                               | <p>Any one of the following:</p> <ul style="list-style-type: none"> <li>• No blinding of outcome assessment, and the outcome measurement is likely to be influenced by lack of blinding;</li> <li>• Blinding of outcome assessment, but likely that the blinding could have been broken, and the outcome measurement is likely to be influenced by lack of blinding.</li> </ul>                                                                                                                                                                                                                                                                                                                                                                                                                                                                                                                       |
| Criteria for the judgement of 'Unclear risk' of bias.                                                                            | <p>Any one of the following:</p> <ul style="list-style-type: none"> <li>• Insufficient information to permit judgement of 'Low risk' or 'High risk';</li> <li>• The study did not address this outcome.</li> </ul>                                                                                                                                                                                                                                                                                                                                                                                                                                                                                                                                                                                                                                                                                    |
| <p><b>INCOMPLETE OUTCOME DATA</b></p> <p><b>Attrition bias due to amount, nature or handling of incomplete outcome data.</b></p> |                                                                                                                                                                                                                                                                                                                                                                                                                                                                                                                                                                                                                                                                                                                                                                                                                                                                                                       |
| Criteria for a judgement of 'Low risk' of bias.                                                                                  | <p>Any one of the following:</p> <ul style="list-style-type: none"> <li>• No missing outcome data;</li> <li>• Reasons for missing outcome data unlikely to be related to true outcome (for survival data, censoring unlikely to be introducing bias);</li> <li>• Missing outcome data balanced in numbers across intervention groups, with similar reasons for missing data across groups;</li> <li>• For dichotomous outcome data, the proportion of missing outcomes compared with observed event risk not enough to have a clinically relevant impact on the intervention effect estimate;</li> <li>• For continuous outcome data, plausible effect size (difference in means or standardized difference in means) among missing outcomes not enough to have a clinically relevant impact on observed effect size;</li> <li>• Missing data have been imputed using appropriate methods.</li> </ul> |
| Criteria for the judgement of 'High risk' of bias.                                                                               | <p>Any one of the following:</p> <ul style="list-style-type: none"> <li>• Reason for missing outcome data likely to be related to true outcome, with either imbalance in numbers or reasons for missing data across intervention groups;</li> <li>• For dichotomous outcome data, the proportion of missing outcomes compared with observed event risk enough to induce clinically relevant bias in intervention effect estimate;</li> <li>• For continuous outcome data, plausible effect size (difference in means or standardized difference in means) among missing outcomes enough to induce clinically relevant bias in observed effect size;</li> <li>• 'As-treated' analysis done with substantial departure of the intervention received from that assigned at randomization;</li> </ul>                                                                                                     |

|                                                                                                    |                                                                                                                                                                                                                                                                                                                                                                                                                                                                                                                                                                                                                                                                                                                                                                             |
|----------------------------------------------------------------------------------------------------|-----------------------------------------------------------------------------------------------------------------------------------------------------------------------------------------------------------------------------------------------------------------------------------------------------------------------------------------------------------------------------------------------------------------------------------------------------------------------------------------------------------------------------------------------------------------------------------------------------------------------------------------------------------------------------------------------------------------------------------------------------------------------------|
|                                                                                                    | <ul style="list-style-type: none"> <li>Potentially inappropriate application of simple imputation.</li> </ul>                                                                                                                                                                                                                                                                                                                                                                                                                                                                                                                                                                                                                                                               |
| Criteria for the judgement of 'Unclear risk' of bias.                                              | <p>Any one of the following:</p> <ul style="list-style-type: none"> <li>Insufficient reporting of attrition/exclusions to permit judgement of 'Low risk' or 'High risk' (e.g. number randomized not stated, no reasons for missing data provided);</li> <li>The study did not address this outcome.</li> </ul>                                                                                                                                                                                                                                                                                                                                                                                                                                                              |
| <p><b>SELECTIVE REPORTING</b></p> <p><b>Reporting bias due to selective outcome reporting.</b></p> |                                                                                                                                                                                                                                                                                                                                                                                                                                                                                                                                                                                                                                                                                                                                                                             |
| Criteria for a judgement of 'Low risk' of bias.                                                    | <p>Any of the following:</p> <ul style="list-style-type: none"> <li>The study protocol is available and all of the study's pre-specified (primary and secondary) outcomes that are of interest in the review have been reported in the pre-specified way;</li> <li>The study protocol is not available but it is clear that the published reports include all expected outcomes, including those that were pre-specified (convincing text of this nature may be uncommon).</li> </ul>                                                                                                                                                                                                                                                                                       |
| Criteria for the judgement of 'High risk' of bias.                                                 | <p>Any one of the following:</p> <ul style="list-style-type: none"> <li>Not all of the study's pre-specified primary outcomes have been reported;</li> <li>One or more primary outcomes is reported using measurements, analysis methods or subsets of the data (e.g. subscales) that were not pre-specified;</li> <li>One or more reported primary outcomes were not pre-specified (unless clear justification for their reporting is provided, such as an unexpected adverse effect);</li> <li>One or more outcomes of interest in the review are reported incompletely so that they cannot be entered in a meta-analysis;</li> <li>The study report fails to include results for a key outcome that would be expected to have been reported for such a study.</li> </ul> |
| Criteria for the judgement of 'Unclear risk' of bias.                                              | Insufficient information to permit judgement of 'Low risk' or 'High risk'. It is likely that the majority of studies will fall into this category.                                                                                                                                                                                                                                                                                                                                                                                                                                                                                                                                                                                                                          |
| <p><b>OTHER BIAS</b></p> <p><b>Bias due to problems not covered elsewhere in the table.</b></p>    |                                                                                                                                                                                                                                                                                                                                                                                                                                                                                                                                                                                                                                                                                                                                                                             |
| Criteria for a judgement of 'Low risk' of bias.                                                    | The study appears to be free of other sources of bias.                                                                                                                                                                                                                                                                                                                                                                                                                                                                                                                                                                                                                                                                                                                      |
| Criteria for the judgement of 'High risk' of bias.                                                 | <p>There is at least one important risk of bias. For example, the study:</p> <ul style="list-style-type: none"> <li>Had a potential source of bias related to the specific study design used; or</li> <li>Has been claimed to have been fraudulent; or</li> </ul>                                                                                                                                                                                                                                                                                                                                                                                                                                                                                                           |

|                                                       |                                                                                                                                                                                                                                                                                         |
|-------------------------------------------------------|-----------------------------------------------------------------------------------------------------------------------------------------------------------------------------------------------------------------------------------------------------------------------------------------|
|                                                       | <ul style="list-style-type: none"><li>• Had some other problem.</li></ul>                                                                                                                                                                                                               |
| Criteria for the judgement of 'Unclear risk' of bias. | <p>There may be a risk of bias, but there is either:</p> <ul style="list-style-type: none"><li>• Insufficient information to assess whether an important risk of bias exists; or</li><li>• Insufficient rationale or evidence that an identified problem will introduce bias.</li></ul> |

#### eMethods 4. Cochrane Tool for Assessment of Bias Across Studies

|                                        | Type of bias     | Risk of bias across all studies                                                                                                                                                                                                                           |
|----------------------------------------|------------------|-----------------------------------------------------------------------------------------------------------------------------------------------------------------------------------------------------------------------------------------------------------|
| Random sequence generation             | Selection bias   | <b>Unclear risk of bias.</b> Mostly this is unclear across the studies. However, those that have the required information documented to make a decision are high risk.<br><br>Therefore there is plausible bias that raises some doubt about the results. |
| Allocation concealment                 | Selection bias   | <b>Unclear risk of bias.</b> Mostly this is unclear across the studies. However, those that have the required information documented to make a decision are high risk.<br><br>Therefore there is plausible bias that raises some doubt about the results. |
| Blinding of participants and personnel | Performance bias | Low risk of bias. Plausible bias unlikely to seriously alter the results.                                                                                                                                                                                 |
| Blinding of outcome assessment         | Detection bias   | Low risk of bias. Plausible bias unlikely to seriously alter the results.                                                                                                                                                                                 |
| Incomplete outcome data                | Attrition bias   | Low risk of bias. Plausible bias unlikely to seriously alter the results.                                                                                                                                                                                 |
| Selective reporting                    | Reporting bias   | Low risk of bias. Plausible bias unlikely to seriously alter the results.                                                                                                                                                                                 |

**eMethods 5.** Refitting the Model Using  $r_i$ 's Taking Values 0.1

Acute administration of ketamine generated an increase in psychopathology in healthy participants, seen as a statistically significant increase in the total symptoms (SMD = 1.37, 95% CI, 1.12 to 1.63,  $P < 0.001$ ), positive symptoms (SMD = 1.42, 95% CI, 1.19 to 1.66,  $P < 0.001$ ) and negative symptoms (SMD = 1.04, 95% CI, 0.85 to 1.23,  $P < 0.001$ ) compared with a placebo condition.

**eMethods 6.** Refitting the Model Using  $r_i$ 's Taking Values 0.7

Acute administration of ketamine generated an increase in psychopathology in healthy participants, seen as a statistically significant increase in the total symptoms (SMD = 1.59, 95% CI, 1.30 to 1.88,  $P < 0.001$ ), positive symptoms (SMD = 1.64, 95% CI, 1.35 to 1.93,  $P < 0.001$ ) and negative symptoms (Standardised mean change score = 1.24, 95% CI, 1.04 to 1.44,  $P < 0.001$ ) compared with a placebo condition.

**eMethods 7.** Comparison of the Effect of Ketamine on Positive and Negative Symptoms Using Correlation Coefficient of 0.1

A comparison of effect sizes demonstrated that ketamine has a greater effect on positive symptoms when compared with negative symptoms (Estimate 0.37, 95% CI=0.13 to 0.61,  $p=0.003$ ).

**eMethods 8.** Comparison of the Effect of Ketamine on Positive and Negative Symptoms Using Correlation Coefficient of 0.7

A comparison of effect sizes demonstrated that ketamine has a greater effect on positive symptoms when compared with negative symptoms (Estimate 0.36, 95% CI=0.11 to 0.61,  $p=0.004$ ).

## **eMethods 9. Heterogeneity Statistics for Subgroup Analyses**

### **Total psychopathology**

#### ***Ketamine preparation***

$I^2$  value for racemic ketamine preparation is 73.86%

$I^2$  value for s-ketamine preparation is 80.34%

#### ***Blinding method***

$I^2$  value for double blind studies is 70.60%

$I^2$  value for unblinded/single blind studies is 83.50%

#### ***Infusion method***

$I^2$  value for the studies including the bolus followed by continuous infusion method is 79.43%

$I^2$  value for the studies including the continuous infusion alone method is 50.73%

#### ***Single-day versus multiple-day studies***

$I^2$  value for single-day studies is 0%

$I^2$  value for multiple-day studies is 63.38%.

### **Positive psychotic symptoms**

#### ***Ketamine preparation***

$I^2$  value for racemic ketamine preparation is 78.28%

$I^2$  value for s-ketamine preparation is 63.81%

#### ***Blinding method***

$I^2$  value for double blind studies is 79.48%

$I^2$  value for unblinded/single blind studies is 60.96%

#### ***Infusion method***

$I^2$  value for the studies including the bolus followed by continuous infusion method is 72.38%.

$I^2$  value for the studies including the continuous infusion alone method is 27.71%

#### ***Single-day versus multiple-day studies***

$I^2$  value for single-day studies is 0%

$I^2$  value for multiple-day studies is 83.00%

### **Negative psychotic symptoms**

#### ***Ketamine preparation***

$I^2$  value for racemic ketamine preparation is 67.24%

$I^2$  value for s-ketamine preparation is 59.06%



**Blinding method**

I<sup>2</sup> value for double blind studies is 39.18%

I<sup>2</sup> value for unblinded/single blind studies is 72.04%

**Infusion method**

I<sup>2</sup> value for the studies including the bolus followed by continuous infusion method is 70.32%

I<sup>2</sup> value for the studies including the continuous infusion alone method is 0%

**Single-day versus multiple-day studies**

I<sup>2</sup> value for single-day studies is 64.59%

I<sup>2</sup> value for multiple-day studies is 62.56%

## **eMethods 10.** Subanalyses of Type of Symptom Scale Used

### **Total psychopathology**

The use of both BPRS and PANSS resulted in a statistically significant effect of ketamine on the positive symptoms. (SMD= 1.45, 95% CI, 1.15 to 1.74,  $p < 0.001$ , and 1.64, 95% CI, 1.05 to 2.24,  $p < 0.001$  respectively). However, there was no significant difference in the magnitude of the association between the two methods ( $p=0.56$ ).

### **Positive psychotic symptoms**

The use of both BPRS and PANSS resulted in a statistically significant effect of ketamine on the positive symptoms. (SMD= 1.68, 95% CI, 0.99 to 2.37,  $p < 0.001$ , and 1.52, 95% CI, 1.23 to 1.81,  $p < 0.001$  respectively). However, there was no significant difference in the magnitude of the association between the two methods ( $p=0.67$ ).

### **Negative psychotic symptoms**

The use of both BPRS and PANSS resulted in a statistically significant effect of ketamine on the positive symptoms. (SMD= 1.27, 95% CI, 0.94, to 1.61,  $p < 0.001$ , and 1.09, 95% CI, 0.85 to 1.33,  $p < 0.001$  respectively). However, there was no significant difference in the magnitude of the association between the two methods ( $p=0.38$ ).

**eFigure 1.** Funnel Plot for Total Symptoms

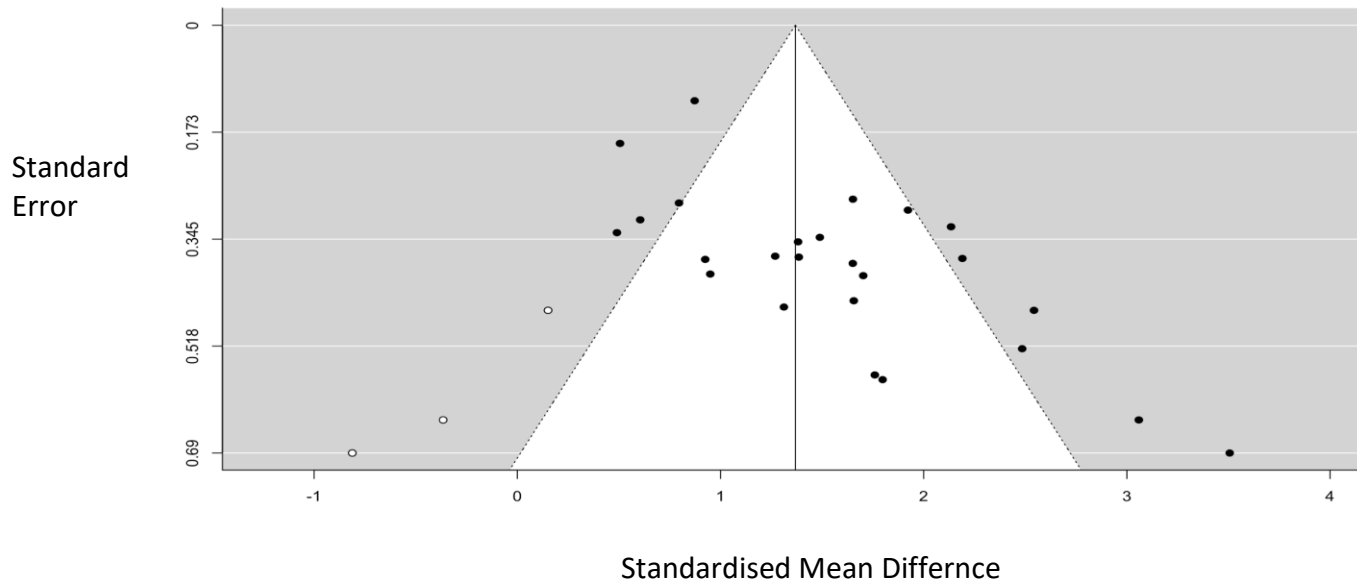

**eFigure 2.** Funnel Plot for Positive Symptoms

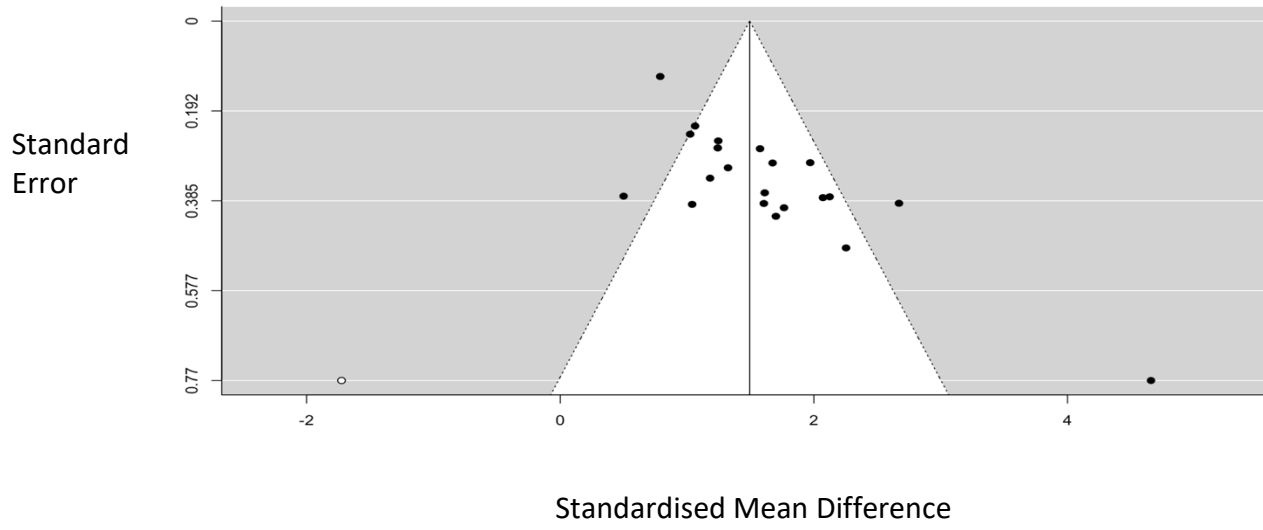

**eFigure 3.** Funnel Plot for Negative Symptoms

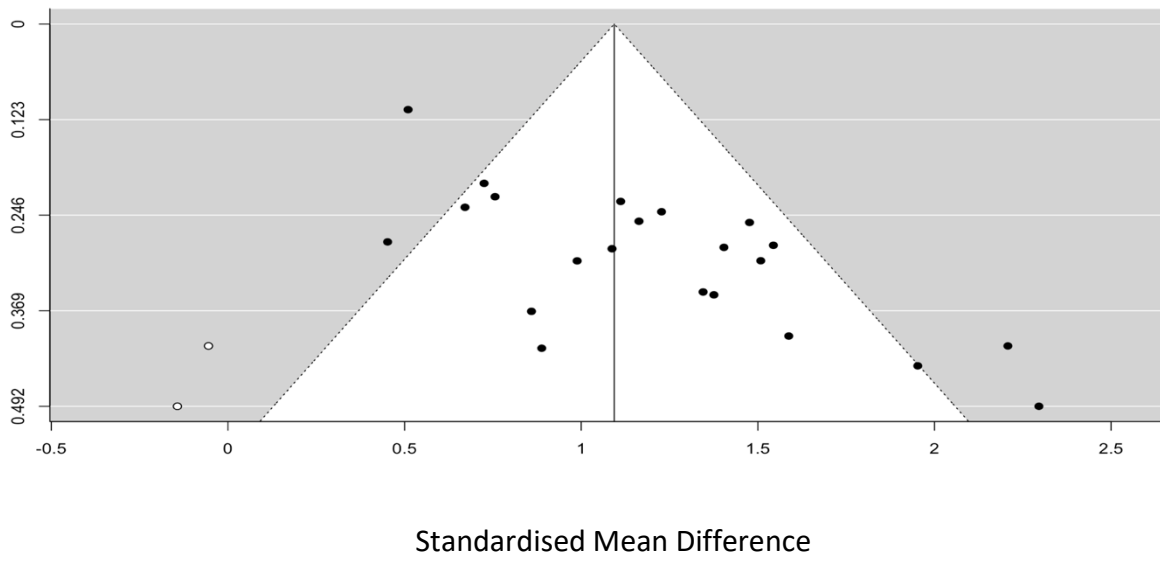

**eFigure 4.** Subgroup Analysis of Single-Day vs Multiple-Day Studies for Total Symptoms

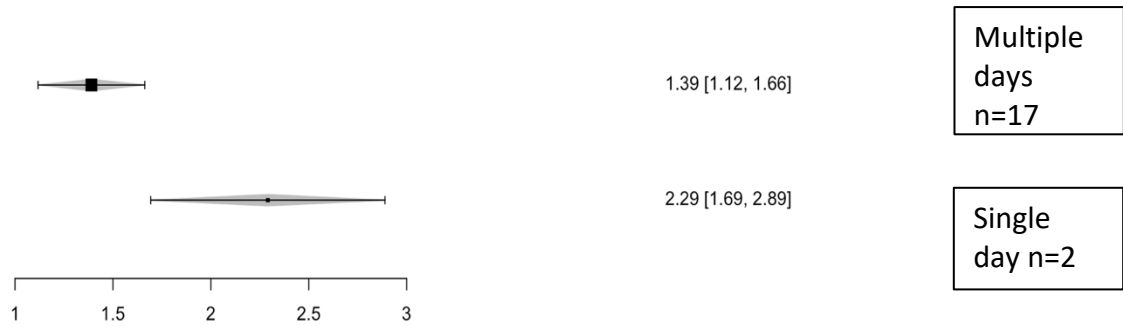

**eFigure 5.** Subgroup Analysis of Method of Infusion (Bolus and a Continuous Infusion vs Only a Continuous Infusion) Positive Symptoms

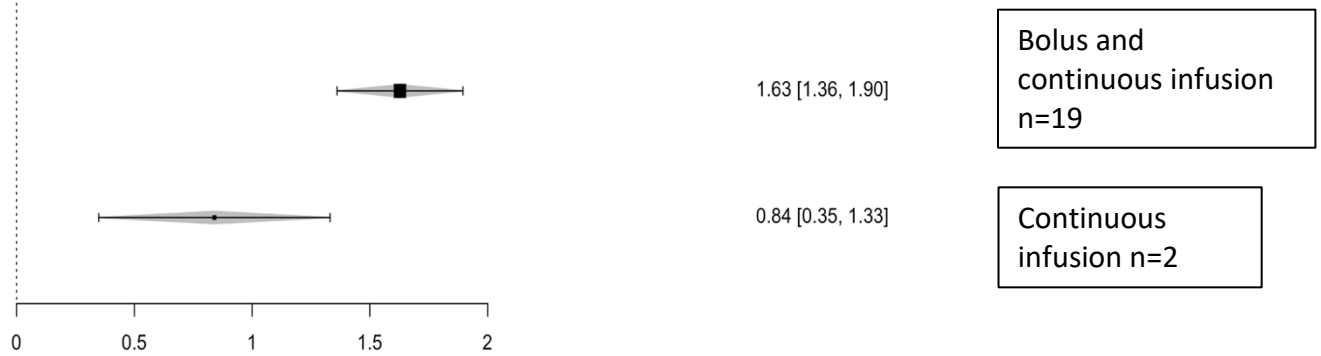

**eTable 1.** Raw Data Used in Total BPRS and PANSS Analysis for Healthy Participants

| Author        | Year | Sample size | Ketamine mean | Ketamine S.D | Placebo mean | Placebo S.D |
|---------------|------|-------------|---------------|--------------|--------------|-------------|
| Kraguljac     | 2017 | 15          | 32.73         | 4.94         | 20.6         | 0.74        |
| Kort          | 2017 | 31          | 20.52         | 5.81         | 8.06         | 0.25        |
| Parwani       | 2005 | 13          | 27.8          | 7.3          | 18.7         | 1.4         |
| Rowland       | 2005 | 10          | 25.4          | 8.2          | 21           | 8.2         |
| Abel          | 2003 | 8           | 12.1          | 5.9          | 1.1          | 1.1         |
| Van Berckel   | 1998 | 18          | 20.6          | 1.7          | 18.2         | 0.4         |
| Malhotra      | 1997 | 16          | 27.1          | 6.4          | 18.7         | 1.6         |
| Duncan        | 2001 | 16          | 26.4          | 5.1          | 18           | 0.6         |
| Rowland       | 2010 | 9           | 23.8          | 3.7          | 20.1         | 0.4         |
| Newcomer      | 1999 | 15          | 23.36         | 2.68         | 19.17        | 1.5         |
| Stone         | 2011 | 8           | 9.6           | 4.7          | 0.9          | 0.7         |
| Passie        | 2003 | 12          | 33            | 5.32         | 23.08        | 5.79        |
| Hoflich       | 2015 | 30          | 54.1          | 14.6         | 31.1         | 2.4         |
| Nagels        | 2011 | 15          | 53.27         | 6.71         | 30.53        | 1.4         |
| Vernaleken    | 2013 | 10          | 46.8          | 16.6         | 30           | 0           |
| Horacek       | 2010 | 20          | 38.35         | 14.82        | 0.65         | 1.26        |
| Krystal       | 2006 | 31          | 40.2          | 21.21        | 29.2         | 0           |
| Grent-'t-Jong | 2018 | 14          | 60.1          | 8.6          | 35.7         | 3.37        |
| Mathalon      | 2014 | 9           | 45.7          | 10.8         | 30           | 0           |
| Abdallah      | 2018 | 14          | 32.71         | 11.94        | 17.43        | 5.095       |
| D'Souza       | 2012 | 32          | 57.97         | 15.11        | 30.56        | 2.84        |
| Morgan        | 2011 | 16          | 11.06         | 4.89         | 7.06         | 0.25        |
| Boeijinga     | 2007 | 12          | 23            | 6.92         | 19           | 2.08        |
| Thiebes       | 2017 | 24          | 53.93         | 10.72        | 31.04        | 1.37        |
| Dickerson     | 2010 | 93          | 35.2          | 5.75         | 30.47        | 0.85        |



**eTable 2.** Raw Data Used in Positive BPRS and PANSS Analysis for Healthy Participants

| Author        | Year | Sample Size | Ketamine mean | Ketamine S.D | Placebo mean | Placebo S.D |
|---------------|------|-------------|---------------|--------------|--------------|-------------|
| Kraguljac     | 2017 | 15          | 5.87          | 1.69         | 3            | 0           |
| Anand         | 2000 | 16          | 8.5           | 2.42         | 4            | 0           |
| Newcomer      | 1999 | 15          | 5             | 1.6          | 3            | 0           |
| Krystal       | 1998 | 23          | 9.2           | 2.55         | 4.2          | 0.74        |
| Breier        | 1997 | 17          | 9.2           | 3.2          | 4.4          | 1           |
| Krystal       | 1999 | 20          | 7.3           | 0.68         | 4            | 0           |
| Krystal       | 2003 | 26          | 8             | 3.88         | 3.9          | 0           |
| Micallef      | 2002 | 8           | 6.7           | 4.8          | 4            | 0           |
| Thiebes       | 2017 | 24          | 11.54         | 3.86         | 6.96         | 0.69        |
| Powers        | 2015 | 19          | 12.8          | 4.14         | 7.08         | 0           |
| Hoflich       | 2015 | 30          | 14.5          | 4.7          | 7.2          | 0.4         |
| Nagels        | 2011 | 15          | 12.5          | 2.22         | 7.3          | 2.14        |
| Vernaleken    | 2013 | 10          | 10.3          | 2.9          | 7            | 0           |
| Krystal       | 2005 | 27          | 9.04          | 2.14         | 6.65         | 0.89        |
| Krystal       | 2006 | 31          | 9.8           | 3.14         | 6.8          | 1.16        |
| Kleinloog     | 2015 | 30          | 13            | 2.5          | 6.8          | 0.6         |
| Grent-'t-Jong | 2018 | 14          | 7.2           | 1.87         | 4.1          | 0.37        |
| D'Souza       | 2018 | 26          | 10.35         | 2.04         | 7.15         | 0.46        |
| Driesen       | 2013 | 22          | 11.18         | 2.06         | 7.18         | 0.5         |
| D'Souza       | 2012 | 32          | 16.25         | 4.69         | 7.47         | 0.8         |
| Dickerson     | 2010 | 93          | 8.87          | 2.27         | 7.22         | 0.47        |

**eTable 3.** Raw Data Used in Negative BPRS and PANSS Analysis for Healthy Participants

| <b>Author</b> | <b>Year</b> | <b>Sample Size</b> | <b>Ketamine mean</b> | <b>Ketamine S.D</b> | <b>Placebo mean</b> | <b>Placebo S.D</b> |
|---------------|-------------|--------------------|----------------------|---------------------|---------------------|--------------------|
| Kraguljac     | 2017        | 15                 | 6.87                 | 1.96                | 3.13                | 0.35               |
| Anand         | 2000        | 16                 | 10.5                 | 5.3                 | 3.4                 | 0.94               |
| Krystal       | 1998        | 23                 | 7.3                  | 2.83                | 3.4                 | 0.94               |
| Krystal       | 1999        | 20                 | 7.8                  | 2                   | 3.2                 | 0                  |
| Krystal       | 2003        | 26                 | 6.8                  | 3                   | 3.2                 | 0                  |
| Duncan        | 2001        | 16                 | 5.8                  | 3                   | 2.9                 | 0.5                |
| Micallef      | 2002        | 8                  | 13.1                 | 10.1                | 3                   | 0                  |
| Malhotra      | 1997        | 16                 | 6.5                  | 2.4                 | 3.5                 | 0.8                |
| Thiebes       | 2017        | 24                 | 14.33                | 4.43                | 8.13                | 0.34               |
| Powers        | 2015        | 19                 | 9.77                 | 2.6                 | 7.21                | 1.18               |
| Hoflich       | 2015        | 30                 | 9.2                  | 2.9                 | 7.3                 | 1                  |
| Nagels        | 2011        | 15                 | 18.12                | 5                   | 7.27                | 1.4                |
| Vernaleken    | 2013        | 10                 | 15                   | 8.51                | 7                   | 0                  |
| Krystal       | 2005        | 27                 | 11.61                | 2.87                | 7.45                | 0.62               |
| Krystal       | 2006        | 31                 | 11.7                 | 4.14                | 7.52                | 1.31               |
| Kleinloog     | 2015        | 30                 | 12                   | 3.8                 | 7.7                 | 1                  |
| Grent-'t-Jong | 2018        | 14                 | 13.5                 | 3.74                | 8                   | 2.24               |
| Abdallah      | 2018        | 14                 | 3.93                 | 2.67                | 2.79                | 0.8                |
| D'Souza       | 2018        | 26                 | 8.54                 | 1.27                | 7.65                | 0.94               |
| Driesen       | 2013        | 22                 | 8.68                 | 2.1                 | 7.41                | 0.91               |

|                  |          |    |       |      |      |      |
|------------------|----------|----|-------|------|------|------|
| <b>D'Souza</b>   | 201<br>2 | 32 | 14.38 | 5.33 | 7.06 | 1.22 |
| <b>Dickerson</b> | 201<br>0 | 93 | 7.87  | 1.41 | 7.24 | 0.6  |

**eTable 4.** Raw Data used in Total, Negative and Positive BPRS and PANSS Analysis for People With Schizophrenia

|                             | <b>n</b> | <b>Placebo condition</b><br>Total: Positive: Negative<br>Mean (S.D) | <b>Ketamine Condition</b><br>Total: Positive: Negative<br>Mean (S.D) |
|-----------------------------|----------|---------------------------------------------------------------------|----------------------------------------------------------------------|
| Malhotra 1997 <sup>59</sup> | 13       | 31.9 (8.7)                                                          | 40.1 (10.5)                                                          |
| Malhotra 1998 <sup>65</sup> | 18       | NR: 8.6 (2.7): 7.6 (2.9)                                            | NR:13.1 (4.0): 9.0 (4.1)                                             |
| Lahti 2001 <sup>20</sup>    | 17       | -0.9 (-3): 0.1 (0.8): 0.2 (0.8)                                     | 6.8 (-9): 3.3 (2.4): 1 (3.1)                                         |

NR: Not reported

**eTable 5.** Study Description, Ketamine Method, Placebo Condition, Symptoms (BPRS and PANSS), and Exclusion Criteria in Studies Examining Acute Ketamine Administration in Healthy Controls

| Study                               | Blinded | Randomised | Ketamine method of administration/ dose/timing                                                                                                                                                                                                 | Placebo condition | Symptoms (BPRS)                                   | Exclusion Criteria                                                                                                                                                        |
|-------------------------------------|---------|------------|------------------------------------------------------------------------------------------------------------------------------------------------------------------------------------------------------------------------------------------------|-------------------|---------------------------------------------------|---------------------------------------------------------------------------------------------------------------------------------------------------------------------------|
| <b>Kraguljac 2017</b> <sup>66</sup> | No      | No         | IV bolus of ketamine 0.27mg/kg over 10mins. Followed by continuous infusion (0.25mg/kg/h, flow rate of 0.01 ml/s). No information on length of infusion<br><br>Time between placebo and ketamine test: same day                                | saline            | Total Positive (2)<br>Negative                    | Family history of psychosis, major medical or neurological disorder, prior exposure to ketamine, concurrent psychotropic medication use                                   |
| <b>Kort 2017</b> <sup>49</sup>      | Double  | Yes        | IV bolus of ketamine 0.23mg/kg over 1min. Followed by 0.58 mg/kg/hour for 30mins. Followed by 0.29 mg/kg/hour for 50 mins.<br><br>Time between placebo and ketamine test: 12.65+/-11.92 days<br><br>Fasted prior to ketamine: yes              | saline            | Total                                             | Past or present psychiatric history, recent substance misuse, family history of psychosis, major medical or neurological disorder, concurrent psychotropic medication use |
| <b>Duncan 2001</b> <sup>50</sup>    | Double  | Yes        | IV ketamine 0.5mg/kg infused over 60mins<br><br>Time between placebo and ketamine test: 8 days (range 4-21)<br><br>Time of day ketamine given: morning<br><br>Fasted prior to ketamine: yes                                                    | saline            | Total Negative<br><br>Timings: 50mins             | Past or present psychiatric history, substance dependence, family history of psychosis, major medical or neurological disorder                                            |
| <b>Parwani 2005</b> <sup>51</sup>   | Double  | Yes        | IV bolus ketamine 0.27 mg/kg over 10mins. Followed by 0.12 mg/kg over the remaining 50 mins<br><br>Time between placebo and ketamine test: 11 days(range 1-75)<br><br>Time of day ketamine given: morning<br><br>Fasted prior to ketamine: yes | saline            | Total<br><br>Timing: 15 mins after infusion start | Past or present psychiatric history, recent substance misuse, major medical or neurological disorder                                                                      |

|                                   |        |     |                                                                                                                                                          |        |                                                                                                                    |                                                                                                                                                                           |
|-----------------------------------|--------|-----|----------------------------------------------------------------------------------------------------------------------------------------------------------|--------|--------------------------------------------------------------------------------------------------------------------|---------------------------------------------------------------------------------------------------------------------------------------------------------------------------|
| <b>Rowland 2005</b> <sup>67</sup> | Double | Yes | IV bolus of ketamine 0.27mg/kg over 10mins. Followed by 0.00225 mg/kg per min for up to 120mins<br><br>Time between placebo and ketamine test: 7-14 days | saline | Total<br><br>Timing: 45 mins after infusion start                                                                  | Past or present psychiatric history, recent substance misuse, family history of psychosis, major medical or neurological disorder                                         |
| <b>Abel 2003</b> <sup>52</sup>    | Double | Yes | IV bolus of ketamine 0.23 mg/kg over 5mins. Followed by an infusion of 0.5mg/kg for 40 to 60 mins<br><br>Time between placebo and ketamine test: >7 days | saline | Total<br><br>Timing: 15 mins after infusion start                                                                  | Past or present psychiatric history, recent substance misuse, major medical or neurological disorder, prior exposure to ketamine, concurrent psychotropic medication use  |
| <b>Anand 2000</b> <sup>68</sup>   | Double | Yes | IV bolus of ketamine 0.26 mg/kg for 1 min. Followed by 0.65 mg/kg for 90mins infusion<br><br>Time between placebo and ketamine test: 3-7 days            | saline | Positive (1)<br>Negative<br><br>Timing: 5mins after infusion start                                                 | Past or present psychiatric history, recent substance misuse, family history of psychosis, major medical or neurological disorder, concurrent psychotropic medication use |
| <b>Krystal 1998</b> <sup>69</sup> | Double | Yes | IV bolus of ketamine 0.26mg/kg for 1 min. Followed IV infusion of 0.65 mg/kg for 60 mins<br><br>Time between placebo and ketamine test: 3-7 days         | saline | Positive (1)<br>Negative<br><br>Timing: positive symptoms 60 mins & negative symptoms 60 mins after infusion start | Past or present psychiatric history, recent substance misuse, family history of psychosis, major medical or neurological disorder                                         |
| <b>Breier 1997</b> <sup>70</sup>  | Double | Yes | IV bolus of ketamine 0.12 mg/kg. Followed by 0.65mg/kg constant infusion for 60mins<br><br>Time between placebo and ketamine test: 7.8 (6.5) days        | saline | Positive (1)                                                                                                       | Past or present psychiatric history, recent substance misuse, major medical or neurological disorder                                                                      |

|                                       |        |     |                                                                                                                                                                                                                                                                                   |        |                                                                                                                              |                                                                                                                                                                                  |
|---------------------------------------|--------|-----|-----------------------------------------------------------------------------------------------------------------------------------------------------------------------------------------------------------------------------------------------------------------------------------|--------|------------------------------------------------------------------------------------------------------------------------------|----------------------------------------------------------------------------------------------------------------------------------------------------------------------------------|
| <b>van Berckel 1998</b> <sup>57</sup> | Double | Yes | <p>IV ketamine 30ml/hr for 40 mins. Followed by 20ml/hr for 10mins. Followed by 10ml/h for 85 mins</p> <p>Time between placebo and ketamine test: &gt; 7 days</p> <p>Time of day ketamine given: morning</p> <p>Fasted prior to ketamine: yes</p>                                 |        | <p>Total</p> <p>Timing: 40mins after infusion start</p>                                                                      | <p>Past or present psychiatric history, recent substance misuse, family history of psychosis, major medical or neurological disorder</p>                                         |
| <b>Malhotra 1997</b> <sup>19</sup>    | Double | Yes | <p>IV ketamine bolus of 0.12mg/kg. Followed by 0.65mg/kg of ketamine (max dose 58 mg) over one hour for a total dose of 0.77mg/kg/hr</p> <p>Time between placebo and ketamine test: &gt;1 day</p> <p>Time of day ketamine given: morning</p> <p>Fasted prior to ketamine: yes</p> | saline | <p>Total Negative</p> <p>Timing: 55 mins after infusion start.</p>                                                           | <p>Past or present psychiatric history, recent substance misuse, major medical or neurological disorder</p>                                                                      |
| <b>Krystal 1999</b> <sup>71</sup>     | Double | Yes | <p>IV bolus of ketamine 0.26 mg/kg over 1 min. Followed infusion of 0.65 mg/kg for 60mins</p> <p>Time between placebo and ketamine test: 3-7 days</p>                                                                                                                             | saline | <p>Positive (1)<br/>Negative</p> <p>Timing: Positive symptoms 60mins &amp; negative symptoms 60 mins post infusion start</p> | <p>Past or present psychiatric history, recent substance misuse, family history of psychosis, major medical or neurological disorder, concurrent psychotropic medication use</p> |

|                                    |        |     |                                                                                                                                                                                                                                                                                        |        |                                                                         |                                                                                                                                                                           |
|------------------------------------|--------|-----|----------------------------------------------------------------------------------------------------------------------------------------------------------------------------------------------------------------------------------------------------------------------------------------|--------|-------------------------------------------------------------------------|---------------------------------------------------------------------------------------------------------------------------------------------------------------------------|
| <b>Krystal 2003</b> <sup>72</sup>  | Double | Yes | IV infusion of 0.5mg/kg ketamine for 40 mins<br><br>Time between placebo and ketamine test: 3-7 days<br><br>Time of day ketamine given: morning<br><br>Fasted prior to ketamine: yes                                                                                                   | saline | Positive (1)<br>Negative<br><br>Timing: 80 mins after start of infusion | Past or present psychiatric history, recent substance misuse, family history of psychosis, major medical or neurological disorder, concurrent psychotropic medication use |
| <b>Micallef 2002</b> <sup>73</sup> | Double | Yes | IV ketamine 0.5 mg/kg infusion for 60 mins<br><br>Time between placebo and ketamine test: 7 days                                                                                                                                                                                       | saline | Positive (1)<br>Negative                                                | Past or present psychiatric history, recent substance misuse, family history of psychosis, major medical or neurological disorder, concurrent psychotropic medication use |
| <b>Rowland 2010</b> <sup>53</sup>  | Double | Yes | IV bolus of ketamine 0.2mg/kg over 10mins. Followed by maintenance dose of 0.4mg/kg/hr. No information on length.<br><br>Time between placebo and ketamine test: >1 day<br><br>Fasted prior to ketamine: yes                                                                           | saline | Total                                                                   | Past or present psychiatric history, recent substance misuse, family history of psychosis, major medical or neurological disorder, prior exposure to ketamine             |
| <b>Newcomer 1999</b> <sup>74</sup> | Double | Yes | IV bolus of 0.27 mg/kg of ketamine over 10mins. Followed by infusion of 0.00225 mg/kg/min. No information on the length of the infusion<br><br>Time between placebo and ketamine test: 2.6 +/-1.1 days<br><br>Time of day ketamine given: morning<br><br>Fasted prior to ketamine: yes | saline | Total<br>Positive (1)<br><br>Timings: 30 mins after start of infusion   | Past or present psychiatric history, recent substance misuse, major medical or neurological disorder, prior exposure to ketamine                                          |



|                                     |        |     |                                                                                                                                                                                                   |        |                                                       |                                                                                                                                                                           |
|-------------------------------------|--------|-----|---------------------------------------------------------------------------------------------------------------------------------------------------------------------------------------------------|--------|-------------------------------------------------------|---------------------------------------------------------------------------------------------------------------------------------------------------------------------------|
| <b>Stone 2011</b> <sup>75</sup>     | Double | Yes | IV bolus of ketamine at a rate of 0.23 mg/kg over 30s followed by an infusion of 0.65 mg/kg/h<br><br>Time between placebo and ketamine test: >1 day                                               | saline | Total                                                 | Major medical or neurological disorder, prior exposure to ketamine                                                                                                        |
| <b>Boeijinga 2007</b> <sup>28</sup> | Double | Yes | IV bolus of ketamine at a rate of 0.081 mg/kg over 10 mins followed by 0.000675 infusion for 120 mins.<br><br>Time between placebo and ketamine test: 7 days<br><br>Fasted prior to ketamine: yes | saline | Total<br><br>Timings: 30 mins after start of infusion | Past or present psychiatric history, recent substance misuse, family history of psychosis, major medical or neurological disorder, concurrent psychotropic medication use |
| <b>Passie 2003</b> <sup>54</sup>    | Double | Yes | IV S-ketamine bolus 5mg over 5 mins. Followed by continuous infusion of 0.005mg/min/kg<br><br>Time between placebo and ketamine test: >7 days<br><br>Time of day ketamine given: afternoon        | saline | Total                                                 | Past or present psychiatric history, recent substance misuse, major medical or neurological disorder                                                                      |

|                                    |        |     |                                                                                                                                                                                                                                                                                |        |                                                                 |                                                                                                                                   |
|------------------------------------|--------|-----|--------------------------------------------------------------------------------------------------------------------------------------------------------------------------------------------------------------------------------------------------------------------------------|--------|-----------------------------------------------------------------|-----------------------------------------------------------------------------------------------------------------------------------|
| <b>Abdallah 2018</b> <sup>76</sup> | Single | No  | IV ketamine bolus 0.23 mg/kg. Followed by continuous infusion of 0.58mg/kg over 75 mins.<br><br>Time between placebo and ketamine test: >7 days<br><br>Time of day ketamine given: afternoon                                                                                   | saline | Total Negative<br><br>Timings: 120 mins after start of infusion | Past or present psychiatric history, recent substance abuse, family history of psychosis, major medical or neurological disorder  |
| <b>Morgan 2011</b> <sup>77</sup>   | Double | no  | IV ketamine with targeted plasma concentration of 100 ng/ml for 60 mins and then 200 ng/ml for further 60mins                                                                                                                                                                  | saline | Total                                                           | Past or present psychiatric history, recent substance misuse                                                                      |
| <b>Horacek 2010</b> <sup>55</sup>  | Double | Yes | IV bolus of 0.27 mg/kg of ketamine over 10mins. Followed by infusion of 0.27mg/kg for 20mins.<br><br>Time between placebo and ketamine test: > 14 days                                                                                                                         | saline | Total<br><br>Timing: 30mins after start of infusion             | Past or present psychiatric history, recent substance misuse, family history of psychosis                                         |
| <b>Thiebes 2017</b> <sup>78</sup>  | Single | Yes | IV bolus of 10 mg of s-ketamine over 5 mins. Followed by infusion of 0.006 mg/kg/min. As ketamine plasma levels slowly increase with continuous infusion, the dosage was reduced by 10% every 10 minutes, for 75 mins.<br><br>Time between placebo and ketamine test: > 7 days | saline | Total Positive Negative                                         | Past or present psychiatric history, recent substance misuse, family history of psychosis, major medical or neurological disorder |

|                                      |        |     |                                                                                                                                                                                                 |        |                                              |                                                                                                                                                                    |
|--------------------------------------|--------|-----|-------------------------------------------------------------------------------------------------------------------------------------------------------------------------------------------------|--------|----------------------------------------------|--------------------------------------------------------------------------------------------------------------------------------------------------------------------|
| <b>Powers 2015</b> <sup>79</sup>     | No     | No  | IV bolus of 0.23 mg/kg of ketamine over 1 min.<br>Followed by infusion of 0.58mg/kg/h for 75 mins.                                                                                              | saline | Positive<br>Negative                         | Past or present psychiatric history, substance dependence, family history of psychosis, major medical or neurological disorder                                     |
| <b>Mathalon 2014</b> <sup>80</sup>   | Double | Yes | IV bolus of 0.26 mg/kg of ketamine over 1 min.<br>Followed by infusion of 0.65mg/kg/h for 120 mins.<br><br>Time between placebo and ketamine test: >3 days<br><br>Fasted prior to ketamine: yes | saline | Total<br><br>Timing: 1min                    | Past or present psychiatric history, substance misuse, family history of psychosis, major medical or neurological disorder                                         |
| <b>Hoflich 2015</b> <sup>81</sup>    | Double | Yes | IV bolus of 0.11 mg/kg of s-ketamine over 1 min.<br>Followed by infusion of 0.12 mg/kg for 19 mins.<br><br>Fasted prior to ketamine: yes                                                        | saline | Total<br>Positive<br>Negative                | Past or present psychiatric history, substance misuse, family history of psychosis, major medical or neurological disorder, concurrent psychotropic medication use |
| <b>Nagels 2011</b> <sup>82</sup>     | Double | Yes | IV bolus of 8mg mg/kg of s-ketamine over 5 min.<br>Followed by infusion of 0.01 mg/kg/min for 60 mins.                                                                                          | saline | Total<br>Positive<br>Negative                | Past or present psychiatric history, substance misuse, family history of psychosis, major medical or neurological disorder                                         |
| <b>Driesen 2013</b> <sup>83</sup>    | No     | No  | IV bolus of 0.23mg/kg of ketamine over 1 min.<br>Followed by infusion of 0.58mg/kg/min for 45 mins.<br><br>Time between placebo and ketamine test: <1 day                                       | saline | Positive<br>Negative<br><br>Timing<br>45mins | Past or present psychiatric history, family history of psychosis, major medical or neurological disorder                                                           |
| <b>Vernaleken 2013</b> <sup>84</sup> | Single | Yes | IV bolus of 8mg of s-ketamine over 5 min.<br>Followed by infusion of 0.01 mg/kg/min for 60 mins.<br><br>Time between placebo and ketamine test: > 7 days                                        | saline | Total<br>Positive<br>Negative                | Past or present psychiatric history, recent substance misuse, major medical or neurological disorder, concurrent psychotropic medication use                       |

|                                     |        |     |                                                                                                                                                                                                                                           |        |                                                                                                                                  |                                                                                                                                                                           |
|-------------------------------------|--------|-----|-------------------------------------------------------------------------------------------------------------------------------------------------------------------------------------------------------------------------------------------|--------|----------------------------------------------------------------------------------------------------------------------------------|---------------------------------------------------------------------------------------------------------------------------------------------------------------------------|
| <b>Krystal 2005</b> <sup>85</sup>   | Double | Yes | IV bolus of 0.23mg/kg of ketamine over 1 min.<br>Followed by infusion of 0.5 mg/kg for 60 mins.<br><br>Time between placebo and ketamine test: >1 day                                                                                     | saline | Positive<br>Negative<br><br>Timing:<br>Positive symptoms 60 mins & negative symptoms 60 mins.                                    | Past or present psychiatric history, recent substance misuse, family history of psychosis, major medical or neurological disorder, concurrent psychotropic medication use |
| <b>Krystal 2006</b> <sup>86</sup>   | Double | Yes | IV bolus of 0.23mg/kg of ketamine over 1 min.<br>Followed by infusion of 0.58 mg/kg/h for 60 mins.<br><br>Time between placebo and ketamine test: > 1 day<br><br>Time of day ketamine given: morning<br><br>Fasted prior to ketamine: yes | saline | Total<br>Positive<br>Negative<br><br>Timing:<br>Total symptoms 80 mins<br>Positive symptoms 80 mins & negative symptoms 10 mins. | Past or present psychiatric history, recent substance misuse, major medical or neurological disorder                                                                      |
| <b>Kleinloog 2015</b> <sup>87</sup> | Double | Yes | IV s-ketamine with targeted plasma concentration of 240 ng/ml (bolus +continuous design used)<br><br>Time between placebo and ketamine test: > 1 day                                                                                      | saline | Total<br>Positive<br>Negative                                                                                                    | Past or present psychiatric history, substance misuse, family history of psychosis, major medical or neurological disorder, concurrent psychotropic medication use        |
| <b>D'Souza 2012</b> <sup>88</sup>   | Double | Yes | IV bolus of 0.23mg/kg of ketamine over 1 min.<br>Followed by infusion of 0.58mg/kg for 30 mins.<br>Followed by 0.29 mg/kg/hour for 64 mins.<br><br>Time between placebo and ketamine test: >2 days<br><br>Fasted prior to ketamine: yes   | saline | Total<br>Positive<br>Negative                                                                                                    | Past or present psychiatric history, recent substance misuse, family history of psychosis, major medical or neurological disorder, concurrent psychotropic medication use |

|                                        |        |     |                                                                                                                                                                                                 |        |                               |                                                                                                                                   |
|----------------------------------------|--------|-----|-------------------------------------------------------------------------------------------------------------------------------------------------------------------------------------------------|--------|-------------------------------|-----------------------------------------------------------------------------------------------------------------------------------|
| <b>Grent-t-Jong 2018</b> <sup>89</sup> | Single | Yes | IV bolus of 10mg of s-ketamine. Followed by infusion of 0.006 mg/kg/min for 45 mins.                                                                                                            | saline | Total<br>Negative<br>Positive | Major medical or neurological disorder                                                                                            |
| <b>D'Souza 2018</b> <sup>90</sup>      | NR     | No  | IV bolus of 0.23 mg/kg of ketamine over 1 min. Followed by infusion of 0.58 mg/kg/hour for 45 mins.<br><br>Time between placebo and ketamine test: <1 day                                       | saline | Total<br>Negative<br>Positive | Past or present psychiatric history, recent substance misuse, family history of psychosis, major medical or neurological disorder |
| <b>Dickerson 2010</b> <sup>91</sup>    | Single | Yes | IV bolus of 0.23 mg/kg of ketamine over 1 min. Followed by infusion of 0.58 mg/kg/hour for 45 mins.<br><br>Time between placebo and ketamine test: >3 days<br><br>Fasted prior to ketamine: yes | saline | Total<br>Negative<br>Positive | Past or present psychiatric history, recent substance misuse, major medical or neurological disorder                              |

BPRS Positive symptoms (1): conceptual disorganisation, suspiciousness, hallucinatory behaviour, unusual thought content

BPRS Positive symptoms (2): conceptual disorganisation, hallucinatory behaviour, unusual thought content

BPRS Negative symptoms: Blunted affect, emotional withdrawal, motor retardation

**eTable 6.** Study Description, Ketamine Administration Method, Placebo Condition, Symptoms (BPRS), and Exclusion Criteria in Studies Examining Acute Ketamine Administration to Patients With Schizophrenia

| Study                       | M:F  | Diagnosis                                 | Medication                                                           | Blinding | Randomised | Ketamine method of administration/dose/timing                                                                                                                                                                                                                               | Placebo condition | Symptoms (BPRS)                                                                | Exclusion                                         |
|-----------------------------|------|-------------------------------------------|----------------------------------------------------------------------|----------|------------|-----------------------------------------------------------------------------------------------------------------------------------------------------------------------------------------------------------------------------------------------------------------------------|-------------------|--------------------------------------------------------------------------------|---------------------------------------------------|
| Malhotra 1998 <sup>92</sup> | 13:5 | Schizophrenia<br>Schizoaffective disorder | Fluphenazine (3)<br><br>Clozapine (4)<br><br>Antipsychotic free (11) | Double   | yes        | IV bolus of 0.12mg/kg of ketamine.<br>Followed by 0.65mg/kg infusion over 60 mins.<br><br>Time between placebo and ketamine test: >1 day                                                                                                                                    |                   | Positive (1)<br>Negative<br><br>Timing: 35 mins after start of infusion        | Medical illness, current alcohol or drug abuse    |
| Malhotra 1997 <sup>59</sup> | 10:3 | Schizophrenia<br>Schizoaffective disorder | Unmedicated for two weeks (12)<br><br>Medication naïve (1)           | Double   | yes        | IV bolus of 0.12mg/kg of ketamine.<br>Followed by 0.65mg/kg of ketamine (max dose 58 mg) over 60mins for a total dose of 0.77mg/kg/hr<br><br>Time between placebo and ketamine test: >1 day<br><br>Time of day ketamine given: morning<br><br>Fasted prior to ketamine: yes | saline            | Total<br><br>Timing: 55 mins                                                   | Medical illness, current alcohol or drug abuse    |
| Lahti 2001 <sup>20</sup>    | 11:6 | Schizophrenia                             | Haloperidol 0.3mg/kg/day                                             | Double   | yes        | IV bolus of 0.3mg/kg of ketamine for 60 secs<br><br>Time between placebo and ketamine test: >1 day                                                                                                                                                                          |                   | Total<br>Positive (2)<br>Negative<br><br>Timing: 20 mins after infusion start. | Medical illness, no current alcohol or drug abuse |

Positive symptoms (1): conceptual disorganisation, suspiciousness, hallucinatory behaviour, unusual thought content

Positive symptoms (2): conceptual disorganisation, hallucinatory behaviour, unusual thought content

Negative symptoms: Blunted affect, emotional withdrawal, motor retardation

## eReferences.

1. Krystal JH, Bennett A, Abi-Saab D, et al. Dissociation of ketamine effects on rule acquisition and rule implementation: possible relevance to NMDA receptor contributions to executive cognitive functions. *Biol Psychiatry*. 2000;47(2):137-143.
2. Abel KM, Allin MPG, Kucharska-Pietura K, et al. Ketamine alters neural processing of facial emotion recognition in healthy men: an fMRI study. *Neuroreport*. 2003;14(3):387-391.
3. Umbricht D, Koller R, Vollenweider FX, Schmid L. Mismatch negativity predicts psychotic experiences induced by NMDA receptor antagonist in healthy volunteers. *Biol Psychiatry*. 2002;51(5):400-406.
4. Malhotra AK, Pinals DA, Weingartner H, et al. NMDA receptor function and human cognition: the effects of ketamine in healthy volunteers. *Neuropsychopharmacology*. 1996;14(5):301-307.
5. Krystal JH, Karper LP, Seibyl JP, et al. Subanesthetic effects of the noncompetitive NMDA antagonist, ketamine, in humans. Psychotomimetic, perceptual, cognitive, and neuroendocrine responses. *Arch Gen Psychiatry*. 1994;51(3):199-214.
6. Passie T, Karst M, Wiese B, Emrich HM, Schneider U. Effects of different subanesthetic doses of (S)-ketamine on neuropsychology, psychopathology, and state of consciousness in man. *Neuropsychobiology*. 2005;51(4):226-233. doi:10.1159/000085724
7. Rowland LM, Bustillo JR, Mullins PG, et al. Effects of Ketamine on Anterior Cingulate Glutamate Metabolism in Healthy Humans: A 4-T Proton MRS Study. *Am J Psychiatry*. 2005;162(2):394-396. doi:10.1176/appi.ajp.162.2.394
8. Rivolta D, Heidegger T, Scheller B, et al. Ketamine Dysregulates the Amplitude and Connectivity of High-Frequency Oscillations in Cortical-Subcortical Networks in Humans: Evidence From Resting-State Magnetoencephalography-Recordings. *Schizophr Bull*. 2015;41(5):1105-1114. doi:https://dx.doi.org/10.1093/schbul/sbv051
9. Mueller F, Musso F, London M, de Boer P, Zacharias N, Winterer G. Pharmacological fMRI: Effects of subanesthetic ketamine on resting-state functional connectivity in the default mode network, salience network, dorsal attention network and executive control network. *NeuroImage Clin*. 2018;19:745-757. doi:https://dx.doi.org/10.1016/j.nicl.2018.05.037
10. Nagels A, Cabanis M, Oppel A, Kirner-Veselinovic A, Schales C, Kircher T. S-Ketamine-Induced NMDA Receptor Blockade during Natural Speech Production and Its Implications for Formal Thought Disorder in Schizophrenia: A PharmacofMRI Study. *Neuropsychopharmacology*. 2018;43(6):1324-1333. doi:https://dx.doi.org/10.1038/npp.2017.270
11. Driesen NR, McCarthy G, Bhagwagar Z, et al. The impact of NMDA receptor blockade on human working memory-related prefrontal function and connectivity. *Neuropsychopharmacology*. 2013;38(13):2613-2622. doi:https://dx.doi.org/10.1038/npp.2013.170
12. Thiebes S, Curic S, Polomac N, et al. The effects of glutamatergic modulation on human auditory perception and behavioural changes in a Mismatch Negativity (MMN) paradigm. *Pharmacopsychiatry*. 2015;48(06):A60. doi:10.1055/s-0035-1557998
13. Oranje B, van Berckel BN, Kemner C, van Ree JM, Kahn RS, Verbaten MN. The effects

- of a sub-anaesthetic dose of ketamine on human selective attention. *Neuropsychopharmacology*. 2000;22(3):293-302.
14. Curic S, Leicht G, Thiebes S, et al. Reduced auditory evoked gamma-band response and schizophrenia-like clinical symptoms under subanesthetic ketamine. *Neuropsychopharmacology*. 2019. doi:<https://dx.doi.org/10.1038/s41386-019-0328-5>
  15. Weiler MA, Thaker GK, Lahti AC, Tamminga CA. Ketamine effects on eye movements. *Neuropsychopharmacology*. 2000;23(6):645-653.
  16. Nagels A, Kirner-Veselinovic A, Wiese R, Paulus FM, Kircher T, Krach S. Effects of ketamine-induced psychopathological symptoms on continuous overt rhyme fluency. *Eur Arch Psychiatry Clin Neurosci*. 2012;262(5):403-414. doi:<https://dx.doi.org/10.1007/s00406-011-0281-8>
  17. Thiebes S, Steinmann S, Curic S, et al. Alterations in interhemispheric gamma-band connectivity are related to the emergence of auditory verbal hallucinations in healthy subjects during NMDA-receptor blockade. *Neuropsychopharmacology*. 2018;43(7):1608-1615. doi:<https://dx.doi.org/10.1038/s41386-018-0014-z>
  18. Medoff DR, Holcomb HH, Lahti AC, Tamminga CA. Probing the human hippocampus using rCBF: Contrasts in schizophrenia. *Hippocampus*. 2001;11(5):543-550. doi:10.1002/hipo.1070
  19. Malhotra AK, Pinals DA, Adler CM, et al. Ketamine-induced exacerbation of psychotic symptoms and cognitive impairment in neuroleptic-free schizophrenics. *Neuropsychopharmacology*. 1997;17(3):141-150.
  20. Lahti AC, Weiler MA, Tamara Michaelidis B., Parwani A, Tamminga CA. Effects of Ketamine in Normal and Schizophrenic Volunteers. *Neuropsychopharmacology*. 2001;25(4):455-467. doi:10.1016/S0893-133X(01)00243-3
  21. Avila MT, Weiler MA, Lahti AC, Tamminga CA, Thaker GK. Effects of ketamine on leading saccades during smooth-pursuit eye movements may implicate cerebellar dysfunction in schizophrenia. *Am J Psychiatry*. 2002;159(9):1490-1496.
  22. Kraguljac NV, Carle M, Frolich MA, et al. Mnemonic Discrimination Deficits in First-Episode Psychosis and a Ketamine Model Suggests Dentate Gyrus Pathology Linked to N-Methyl-D-Aspartate Receptor Hypofunction. *Biol psychiatry Cogn Neurosci neuroimaging*. 2018;3(3):231-238. doi:<https://dx.doi.org/10.1016/j.bpsc.2017.02.005>
  23. Holcomb HH, Lahti AC, Medoff DR, Weiler M, Tamminga CA. Sequential regional cerebral blood flow brain scans using PET with H2(15)O demonstrate ketamine actions in CNS dynamically. *Neuropsychopharmacology*. 2001;25(2):165-172.
  24. LaPorte DJ, Blaxton TA, Michaelidis T, et al. Subtle effects of ketamine on memory when administered following stimulus presentation. *Psychopharmacology (Berl)*. 2005;180(3):385-390.
  25. Kegeles LS, Abi-Dargham A, Zea-Ponce Y, et al. Modulation of amphetamine-induced striatal dopamine release by ketamine in humans: implications for schizophrenia. *Biol Psychiatry*. 2000;48(7):627-640.
  26. Ahn K-H, Youn T, Cho SS, et al. N-methyl-D-aspartate receptor in working memory impairments in schizophrenia: event-related potential study of late stage of working memory process. *Prog Neuropsychopharmacol Biol Psychiatry*. 2003;27(6):993-999.
  27. Kegeles LS, Martinez D, Kochan LD, et al. NMDA antagonist effects on striatal dopamine release: positron emission tomography studies in humans. *Synapse*. 2002;43(1):19-29.
  28. Boeijinga PH, Soufflet L, Santoro F, Luthringer R. Ketamine effects on CNS responses



- assessed with MEG/EEG in a passive auditory sensory-gating paradigm: an attempt for modelling some symptoms of psychosis in man. *J Psychopharmacol*. 2007;21(3):321-337. doi:10.1177/0269881107077768
29. Adler CM, Goldberg TE, Malhotra AK, Pickar D, Breier A. Effects of ketamine on thought disorder, working memory, and semantic memory in healthy volunteers. *Biol Psychiatry*. 1998;43(11):811-816.  
http://ovidsp.ovid.com/ovidweb.cgi?T=JS&PAGE=reference&D=med4&NEWS=N&AN=9611670.
  30. Gunduz-Bruce H, Reinhart RMG, Roach BJ, et al. Glutamatergic modulation of auditory information processing in the human brain. *Biol Psychiatry*. 2012;71(11):969-977. doi:https://dx.doi.org/10.1016/j.biopsych.2011.09.031
  31. Holcomb HH, Lahti AC, Medoff DR, Cullen T, Tamminga CA. Effects of noncompetitive NMDA receptor blockade on anterior cingulate cerebral blood flow in volunteers with schizophrenia. *Neuropsychopharmacology*. 2005;30(12):2275-2282.
  32. Vinckier F, Gaillard R, Palminteri S, et al. Confidence and psychosis: a neuro-computational account of contingency learning disruption by NMDA blockade. *Mol Psychiatry*. 2016;21(7):946-955. doi:https://dx.doi.org/10.1038/mp.2015.73
  33. Oranje B, Gispen-de Wied CC, Westenberg HG, Kemner C, Verbaten MN, Kahn RS. Haloperidol counteracts the ketamine-induced disruption of processing negativity, but not that of the P300 amplitude. *Int J Neuropsychopharmacol*. 2009;12(6):823-832.
  34. Moaddel R, Shardell M, Khadeer M, et al. Plasma metabolomic profiling of a ketamine and placebo crossover trial of major depressive disorder and healthy control subjects. Ali-Sisto Anderson, Baranyi, Berman, Bersani, Cervenka, Chrapko, Chrapko, Darlington, Diazgranados, DiazGranados, Dinoff, Dobos, Domin, First, Forstermann, Gowda, Gracia-Garcia, Guldbbrandt, Harraz, Heisler, Hess, Iadarola, Kessler, Kiecolt-Glaser, Kornhu A, ed. *Psychopharmacology (Berl)*. 2018;235(10):3017-3030. doi:http://dx.doi.org/10.1007/s00213-018-4992-7
  35. Musso F, Brinkmeyer J, Ecker D, et al. Ketamine effects on brain function-simultaneous fMRI/EEG during a visual oddball task. *Neuroimage*. 2011;58(2):508-525. doi:https://dx.doi.org/10.1016/j.neuroimage.2011.06.045
  36. Honey GD, Corlett PR, Absalom AR, et al. Individual differences in psychotic effects of ketamine are predicted by brain function measured under placebo. *J Neurosci*. 2008;28(25):6295-6303. doi:https://dx.doi.org/10.1523/JNEUROSCI.0910-08.2008
  37. Aalto S, Hirvonen J, Kajander J, et al. Ketamine does not decrease striatal dopamine D2 receptor binding in man. *Psychopharmacology (Berl)*. 2002;164(4):401-406.
  38. Aalto S, Ihalaainen J, Hirvonen J, et al. Cortical glutamate-dopamine interaction and ketamine-induced psychotic symptoms in man. *Psychopharmacology (Berl)*. 2005;182(3):375-383.
  39. Abel KM, Allin MP., Hemsley DR, Geyer MA. Low dose ketamine increases prepulse inhibition in healthy men. *Neuropharmacology*. 2003;44(6):729-737. doi:10.1016/S0028-3908(03)00073-X
  40. Stone JM, Erlandsson K, Arstad E, et al. Relationship between ketamine-induced psychotic symptoms and NMDA receptor occupancy: a [(123)I]CNS-1261 SPET study. *Psychopharmacology (Berl)*. 2008;197(3):401-408. doi:https://dx.doi.org/10.1007/s00213-007-1047-x
  41. Fu CHY, Abel KM, Allin MPG, et al. Effects of ketamine on prefrontal and striatal

- regions in an overt verbal fluency task: a functional magnetic resonance imaging study. *Psychopharmacology (Berl)*. 2005;183(1):92-102.
42. Dandash O, Harrison BJ, Adapa R, et al. Selective augmentation of striatal functional connectivity following NMDA receptor antagonism: implications for psychosis. *Neuropsychopharmacology*. 2015;40(3):622-631. doi:<https://dx.doi.org/10.1038/npp.2014.210>
  43. Höflich A, Hahn A, Küblböck M, et al. Ketamine-dependent neuronal activation in healthy volunteers. *Brain Struct Funct*. 2017;222(3):1533-1542. doi:10.1007/s00429-016-1291-0
  44. Umbricht D, Schmid L, Koller R, Vollenweider FX, Hell D, Javitt DC. Ketamine-Induced Deficits in Auditory and Visual Context-Dependent Processing in Healthy Volunteers. *Arch Gen Psychiatry*. 2000;57(12):1139. doi:10.1001/archpsyc.57.12.1139
  45. Krystal JH, Abi-Saab W, Perry E, et al. Preliminary evidence of attenuation of the disruptive effects of the NMDA glutamate receptor antagonist, ketamine, on working memory by pretreatment with the group II metabotropic glutamate receptor agonist, LY354740, in healthy human subjects. *Psychopharmacology (Berl)*. 2005;179(1):303-309. doi:10.1007/s00213-004-1982-8
  46. Daumann J, Heekeren K, Neukirch A, Thiel CM, Moller-Hartmann W, Gouzoulis-Mayfrank E. Pharmacological modulation of the neural basis underlying inhibition of return (IOR) in the human 5-HT<sub>2A</sub> agonist and NMDA antagonist model of psychosis. *Psychopharmacology (Berl)*. 2008;200(4):573-583. doi:<https://dx.doi.org/10.1007/s00213-008-1237-1>
  47. Deakin JFW, Lees J, McKie S, Hallak JEC, Williams SR, Dursun SM. Glutamate and the neural basis of the subjective effects of ketamine: a pharmaco-magnetic resonance imaging study. *Arch Gen Psychiatry*. 2008;65(2):154-164. doi:<https://dx.doi.org/10.1001/archgenpsychiatry.2007.37>
  48. Hong LE, Summerfelt A, Buchanan RW, et al. Gamma and delta neural oscillations and association with clinical symptoms under subanesthetic ketamine. *Neuropsychopharmacology*. 2010;35(3):632-640. doi:<https://dx.doi.org/10.1038/npp.2009.168>
  49. Kort NS, Ford JM, Roach BJ, et al. Role of N-Methyl-D-Aspartate Receptors in Action-Based Predictive Coding Deficits in Schizophrenia. *Biol Psychiatry*. 2017;81(6):514-524. doi:<https://dx.doi.org/10.1016/j.biopsych.2016.06.019>
  50. Duncan EJ, Madonick SH, Parwani A, et al. Clinical and Sensorimotor Gating Effects of Ketamine in Normals. *Neuropsychopharmacology*. 2001;25(1):72-83. doi:10.1016/S0893-133X(00)00240-2
  51. Parwani A, Weiler MA, Blaxton TA, et al. The effects of a subanesthetic dose of ketamine on verbal memory in normal volunteers. *Psychopharmacology (Berl)*. 2005;183(3):265-274. doi:10.1007/s00213-005-0177-2
  52. Abel KM, Allin MPG, Kucharska-Pietura K, et al. Ketamine and fMRI BOLD signal: Distinguishing between effects mediated by change in blood flow versus change in cognitive state. *Hum Brain Mapp*. 2003;18(2):135-145. doi:10.1002/hbm.10064
  53. Rowland LM, Beason-Held L, Tamminga CA, Holcomb HH. The interactive effects of ketamine and nicotine on human cerebral blood flow. *Psychopharmacology (Berl)*. 2010;208(4):575-584. doi:10.1007/s00213-009-1758-2
  54. Passie T, Karst M, Borsutzky M, Wiese B, Emrich HM, Schneider U. Effects of different subanaesthetic doses of (S)-ketamine on psychopathology and binocular depth

- inversion in man. *J Psychopharmacol*. 2003;17(1):51-56.  
doi:10.1177/0269881103017001698
55. Horacek J, Brunovsky M, Novak T, et al. Subanesthetic dose of ketamine decreases prefrontal theta cordance in healthy volunteers: implications for antidepressant effect. *Psychol Med*. 2010;40(09):1443-1451. doi:10.1017/S0033291709991619
  56. Vollenweider FX, Vontobel P, Oye I, Hell D, Leenders KL. Effects of (S)-ketamine on striatal dopamine: a [<sup>11</sup>C]raclopride PET study of a model psychosis in humans. *J Psychiatr Res*. 2000;34(1):35-43.
  57. van Berckel BN, Oranje B, van Ree JM, Verbaten MN, Kahn RS. The effects of low dose ketamine on sensory gating, neuroendocrine secretion and behavior in healthy human subjects. *Psychopharmacology (Berl)*. 1998;137(3):271-281.
  58. Malhotra AK, Adler CM, Kennison SD, Elman I, Pickar D, Breier A. Clozapine blunts N-methyl-D-aspartate antagonist-induced psychosis: A study with ketamine. *Biol Psychiatry*. 1997;42(8):664-668.
  59. Malhotra AK, Pinals DA, Adler CM, et al. Ketamine-induced exacerbation of psychotic symptoms and cognitive impairment in neuroleptic-free schizophrenics. *Neuropsychopharmacology*. 1997;17(3):141-150.
  60. Lahti A, Koffel B, LaPorte D, Tamminga CA. Subanesthetic Doses of Ketamine Stimulate Psychosis in Schizophrenia. *Neuropsychopharmacology*. 1995;13(1):9-19. doi:10.1016/0893-133X(94)00131-I
  61. LaPorte DJ, Lahti AC, Koffel B, Tamminga CA. Absence of ketamine effects on memory and other cognitive functions in schizophrenia patients. *J Psychiatr Res*. 1996;30(5):321-330.
  62. Lahti AC, Holcomb HH, Medoff DR, Tamminga CA. Ketamine activates psychosis and alters limbic blood flow in schizophrenia. *Neuroreport*. 1995;6(6):869-872.
  63. Lahti AC, Warfel D, Michaelidis T, Weiler MA, Frey K, Tamminga CA. Long-term outcome of patients who receive ketamine during research. *Biol Psychiatry*. 2001;49(10):869-875.
  64. [https://handbook-5-1.cochrane.org/chapter\\_8/table\\_8\\_7\\_a\\_possible\\_approach\\_for\\_summary\\_assessments\\_of\\_the.htm](https://handbook-5-1.cochrane.org/chapter_8/table_8_7_a_possible_approach_for_summary_assessments_of_the.htm), <http://handbook-5-1.cochrane.org/>).
  65. Malhotra A, Breier A, Goldman D, Picken L, Pickar D. The Apolipoprotein E ε4 Allele Is Associated with Blunting of Ketamine-Induced Psychosis in Schizophrenia A Preliminary Report. *Neuropsychopharmacology*. 1998;19(5):445-448. doi:10.1016/S0893-133X(98)00031-1
  66. Kraguljac N V, Frölich MA, Tran S, et al. Ketamine modulates hippocampal neurochemistry and functional connectivity: a combined magnetic resonance spectroscopy and resting-state fMRI study in healthy volunteers. *Mol Psychiatry*. 2017;22(4):562-569. doi:10.1038/mp.2016.122
  67. Rowland LM, Astur RS, Jung RE, Bustillo JR, Lauriello J, Yeo RA. Selective cognitive impairments associated with NMDA receptor blockade in humans. *Neuropsychopharmacology*. 2005;30(3):633-639.
  68. Anand A, Charney DS, Oren DA, et al. Attenuation of the neuropsychiatric effects of ketamine with lamotrigine: Support for hyperglutamatergic effects of N-methyl-D-aspartate receptor antagonists. *Arch Gen Psychiatry*. 2000;57(3):270-276. doi:http://dx.doi.org/10.1001/archpsyc.57.3.270
  69. Krystal JH, Karper LP, Bennett A, et al. Interactive effects of subanesthetic ketamine

- and subhypnotic lorazepam in humans. *Psychopharmacology (Berl)*. 1998;135(3):213-229. doi:10.1007/s002130050503
70. Breier A, Malhotra AK, Pinals DA, Weisenfeld NI, Pickar D. Association of ketamine-induced psychosis with focal activation of the prefrontal cortex in healthy volunteers. *Am J Psychiatry*. 1997. doi:10.1176/ajp.154.6.805
  71. Krystal JH, D'Souza DC, Karper LP, et al. Interactive effects of subanesthetic ketamine and haloperidol in healthy humans. *Psychopharmacology (Berl)*. 1999;145(2):193-204. doi:10.1007/s002130051049
  72. Krystal JH, Petrakis IL, Limoncelli D, et al. Altered NMDA Glutamate Receptor Antagonist Response in Recovering Ethanol-Dependent Patients. *Neuropsychopharmacology*. 2003;28(11):2020-2028. doi:10.1038/sj.npp.1300252
  73. Micallef J, Guillermain Y, Tardieu S, et al. Effects of subanesthetic doses of ketamine on sensorimotor information processing in healthy subjects. *Clin Neuropharmacol*. 2002;25(2):101-106. doi:http://dx.doi.org/10.1097/00002826-200203000-00008
  74. Newcomer JW, Farber NB, Jevtovic-Todorovic V, et al. Ketamine-induced NMDA receptor hypofunction as a model of memory impairment and psychosis. *Neuropsychopharmacology*. 1999;20(2):106-118. doi:10.1016/S0893-133X(98)00067-0
  75. Stone JM, Abel KM, Allen MPG, et al. Ketamine-Induced Disruption of Verbal Self-Monitoring Linked to Superior Temporal Activation. *Pharmacopsychiatry*. 2010;44(01):33-48. doi:10.1055/s-0030-1267942
  76. Abdallah CG, De Feyter HM, Averill LA, et al. The effects of ketamine on prefrontal glutamate neurotransmission in healthy and depressed subjects. *Neuropsychopharmacology*. 2018;43(10):2154-2160. doi:https://dx.doi.org/10.1038/s41386-018-0136-3
  77. Morgan HL, Turner DC, Corlett PR, et al. Exploring the impact of ketamine on the experience of illusory body ownership. *Biol Psychiatry*. 2011;69(1):35-41. doi:https://dx.doi.org/10.1016/j.biopsych.2010.07.032
  78. Thiebes S, Leicht G, Curic S, et al. Glutamatergic deficit and schizophrenia-like negative symptoms: new evidence from ketamine-induced mismatch negativity alterations in healthy male humans. *J Psychiatry Neurosci*. 2017;42(4):273-283.
  79. Powers AR 3rd, Gancsos MG, Finn ES, Morgan PT, Corlett PR. Ketamine-Induced Hallucinations. *Psychopathology*. 2015;48(6):376-385. doi:https://dx.doi.org/10.1159/000438675
  80. Mathalon DH, Ahn K-H, Perry EBJ, et al. Effects of nicotine on the neurophysiological and behavioral effects of ketamine in humans. *Front psychiatry*. 2014;5:3. doi:https://dx.doi.org/10.3389/fpsy.2014.00003
  81. Hoflich A, Hahn A, Kublbock M, et al. Ketamine-Induced Modulation of the Thalamo-Cortical Network in Healthy Volunteers As a Model for Schizophrenia. *Int J Neuropsychopharmacol*. 2015;18(9). doi:https://dx.doi.org/10.1093/ijnp/pyv040
  82. Nagels A, Kirner-Veselinovic A, Krach S, Kircher T. Neural correlates of S-ketamine induced psychosis during overt continuous verbal fluency. *Neuroimage*. 2011;54(2):1307-1314. doi:10.1016/J.NEUROIMAGE.2010.08.021
  83. Driesen NR, McCarthy G, Bhagwagar Z, et al. Relationship of resting brain hyperconnectivity and schizophrenia-like symptoms produced by the NMDA receptor antagonist ketamine in humans. *Mol Psychiatry*. 2013;18(11):1199-1204. doi:https://dx.doi.org/10.1038/mp.2012.194

84. Vernaleken I, Klomp M, Moeller O, et al. Vulnerability to psychotogenic effects of ketamine is associated with elevated D2/3-receptor availability. *Int J Neuropsychopharmacol*. 2013;16(04):745-754. doi:10.1017/S1461145712000764
85. Krystal JH, Perry EB, Gueorguieva R, et al. Comparative and Interactive Human Psychopharmacologic Effects of Ketamine and Amphetamine. *Arch Gen Psychiatry*. 2005;62(9):985. doi:10.1001/archpsyc.62.9.985
86. Krystal JH, Madonick S, Perry E, et al. Potentiation of low dose ketamine effects by naltrexone: potential implications for the pharmacotherapy of alcoholism. *Neuropsychopharmacology*. 2006;31(8):1793-1800.
87. Kleinlog D, den Boogaard AU, Dahan A, et al. Optimizing the glutamatergic challenge model for psychosis, using S(+)-ketamine to induce psychomimetic symptoms in healthy volunteers. *J Psychopharmacol*. 2015;29(4):401-413. doi:http://dx.doi.org/10.1177/0269881115570082
88. D'Souza DC, Ahn K, Bhakta S, et al. Nicotine fails to attenuate ketamine-induced cognitive deficits and negative and positive symptoms in humans: implications for schizophrenia. *Biol Psychiatry*. 2012;72(9):785-794. doi:https://dx.doi.org/10.1016/j.biopsych.2012.05.009
89. Grent-'t-Jong T, Rivolta D, Gross J, et al. Acute ketamine dysregulates task-related gamma-band oscillations in thalamo-cortical circuits in schizophrenia. *Brain*. 2018;141(8):2511-2526. doi:https://dx.doi.org/10.1093/brain/awy175
90. D'Souza DC, Carson RE, Driesen N, et al. Dose-Related Target Occupancy and Effects on Circuitry, Behavior, and Neuroplasticity of the Glycine Transporter-1 Inhibitor PF-03463275 in Healthy and Schizophrenia Subjects. *Biol Psychiatry*. 2018;84(6):413-421. doi:https://dx.doi.org/10.1016/j.biopsych.2017.12.019
91. Dickerson D, Pittman B, Ralevski E, et al. Ethanol-like effects of thiopental and ketamine in healthy humans. *J Psychopharmacol*. 2010;24(2):203-211. doi:10.1177/0269881108098612
92. Malhotra AK, Breier A, Goldman D, Picken L, Pickar D. The apolipoprotein E epsilon 4 allele is associated with blunting of ketamine-induced psychosis in schizophrenia. A preliminary report. *Neuropsychopharmacology*. 1998;19(5):445-448.
